1 TITLE: Invasive Siberian chipmunks *Eutamias sibiricus* in Italy: a socio-ecological analysis  
2 indicates that they could, and should, be removed

3

4 AUTHORS: Jacopo Cerri<sup>1\*</sup>, Emiliano Mori<sup>2</sup>, Rudy Zozzoli<sup>3</sup>, Andrea Gigliotti<sup>4</sup>, Antony Chirco<sup>5</sup>,  
5 Sandro Bertolino<sup>6</sup>

6

7 AUTHORS' INSTITUTIONAL AFFILIATIONS:

8 1. Istituto Superiore per la Protezione e la Ricerca Ambientale, Piazzale dei Marmi 12, 57123,  
9 Livorno, Italy. Email: [jacopo.cerri@isprambiente.it](mailto:jacopo.cerri@isprambiente.it), mobile phone: (+39)3395692346.

10 ORCID ID: 0000-0001-5030-0376. Contribution: major contribution in the conception and  
11 design of the study, altogether with the analysis and interpretation of data and with  
12 manuscript drafting;

13 2. Dipartimento di Scienze della Vita, Università degli Studi di Siena. Via P.A. Mattioli 4,  
14 53100, Siena, Italy. Email: [moriemiliano@tiscali.it](mailto:moriemiliano@tiscali.it). Italy. ORCID ID: 0000-0001-8108-  
15 7950. Contribution: conception and design of the study, data collection and interpretation of  
16 the data. Important contribution in manuscript editing;

17 3. Dipartimento di Scienze Chimiche, della Vita e della Sostenibilità Ambientale, Università  
18 degli Studi di Parma, Parco Area delle Scienze, 11a, 43124, Parma, Italy. Email:  
19 [zozzoli.rudy@gmail.com](mailto:zozzoli.rudy@gmail.com). Contribution: conception and design of the study, data  
20 acquisition on the field, intellectual role in manuscript revision;

21 4. Dipartimento di Scienze delle Produzioni Animali e dell'Ambiente, Università degli Studi di  
22 Firenze, Piazzale delle Cascine, 18, 50144 Firenze, Italy. Email:  
23 [andrea.gigliotti1988@libero.it](mailto:andrea.gigliotti1988@libero.it). Contribution: data acquisition on the field, data interpretation,  
24 intellectual role in manuscript revision;

25 5. Dipartimento di Biologia, Università degli Studi di Firenze, Via Madonna del Piano, 6,  
26 50019 Sesto Fiorentino FI. Email: [antony.chirco@stud.unifi.it](mailto:antony.chirco@stud.unifi.it). Contribution: data  
27 acquisition on the field, data interpretation, intellectual role in manuscript revision;

28 6. Department of Life Sciences and Systems Biology, University of Turin, Via Accademia  
29 Albertina 13, 10123 Torino, Italy. Email: [sandro.bertolino@unito.it](mailto:sandro.bertolino@unito.it). Telephone:  
30 (+39)0116704513. ORCID ID: 0000-0002-1063-8281. Contribution: conception and design  
31 of the study, analysis and interpretation of data and manuscript drafting;

32

33 CORRESPONDING AUTHOR: Jacopo Cerri, Istituto Superiore per la Protezione e la Ricerca  
34 Ambientale, Piazzale dei Marmi 12, 57123, Livorno, Italy. Email: [jacopo.cerri@isprambiente.it](mailto:jacopo.cerri@isprambiente.it),  
35 mobile phone: (+39)3395692346. ORCID ID: 0000-0001-5030-0376.

36

37

38

39

40

41

42

43

44

45

46

47

48

49

50

51 ABSTRACT

52 BACKGROUND: Eradication of invasive alien species is a form of pest control linked to  
53 biodiversity conservation that usually involves killing animals. Squirrels are prominent among  
54 invasive alien species in Italy with four species introduced. Three of them are included within the  
55 list of alien species of European concern and their eradication and control is recommended.  
56 However, their local control is not an easy task, being highly appreciated by the general public. We  
57 propose a socio-ecological approach to evaluate the feasibility of eradicating Siberian chipmunks  
58 (*Eutamias sibiricus*) populations. We performed a structured questionnaire to assess the social  
59 perception of invasive Siberian chipmunks in urban parks where they occur and to identify groups  
60 of visitors who might oppose eradication. We also carried out geographic profiling to test for the  
61 spatial expansion of chipmunk populations.

62 RESULTS: Overall, park visitors regarded chipmunks positively and appreciated to see them, but  
63 human-chipmunk interactions were still rare. We did not identify any group of visitors with a  
64 strong attachment to chipmunks, who might oppose future control programs. Geographic profiling  
65 showed that chipmunks in Valeggio sul Mincio are starting to expand outside of their introduction  
66 site.

67 CONCLUSIONS: Data from questionnaires show that chipmunks eradication, coupled with  
68 adequate communication initiatives, might be feasible. Moreover, geographic profiling indicates  
69 that time for a rapid removal is running out. Socio-ecological approaches, combining the analysis of  
70 structured questionnaires administered to stakeholders and statistical modeling of pest observations,  
71 could be a valuable tool to decide the feasibility and the urgency of invasive pest control.

72

73 Keywords: Alien squirrels, eradication, geographic profiling, pest control, socio-ecological model

74

75

76

77 1 INTRODUCTION

78 The Siberian chipmunk *Eutamias sibiricus* is a widespread species in Russia and the Far East,  
79 which has become invasive in some European countries since the 1960s after its widespread trade  
80 as a pet species.<sup>1</sup> Chipmunks established viable populations in Italy<sup>1</sup>, chipmunks that escaped from  
81 captivity established four viable populations in Northern Italy, and at two urban parks in Rome.  
82 Siberian chipmunks are not a mainstream invader, as the Eastern grey squirrel *Sciurus carolinensis*;<sup>2</sup>  
83 however, they are considered an invasive alien species of European concern being listed within the  
84 EU Regulation 1143/2014. Particularly, chipmunks can act as a vector of tick-borne diseases and  
85 zoonoses.<sup>3,4</sup> The European regulation requires member states to eradicate listed species from their  
86 territories when it is still possible and this appears the situation in Italy where the species is still  
87 localized with small populations.<sup>5,6</sup>

88 Management interventions aimed at containing or removing invasive alien mammals are more  
89 feasible when two ideal conditions occur. First, they are more cost-effective and face a higher  
90 success rate whenever the target species are still in the early stages of their invasion.<sup>7-9</sup> Second,  
91 eradication initiatives tend to be more feasible when target species have minor interactions with  
92 society.<sup>10</sup> Attempts to remove iconic alien mammals could result in strong opposition from some  
93 stakeholders.<sup>11,12</sup> For instance, a trial eradication of the gray squirrel from Italy attempted in the 1990s  
94 was stopped by animal rights groups who brought the case in front of the court.<sup>13</sup>

95 Preliminary social impact assessments can tell managers whether control interventions will be  
96 opposed by relevant stakeholders and how they can be designed accordingly, to be successful.<sup>14,15</sup>

97 Socio-ecological assessments go one step further, by combining information from relevant  
98 stakeholders, obtained through qualitative or quantitative methods from the social sciences, with  
99 information about the ecology, distribution and population dynamics of target species<sup>16</sup>. Ecological  
100 information can also be spatially explicit, as most ecological processes incorporate a geographical  
101 dimension<sup>17</sup>.

102 Eradicating chipmunks from Italy is required under the European and national legal framework, but,  
103 to the best of our knowledge, no study was conducted to verify if the preconditions for a successful  
104 eradication occur. Social prerequisites are particular sensitive considering the strong opposition  
105 faced by managers aiming to control or eradicate the gray squirrel in this country, even in recent  
106 years.<sup>13, 18, 19</sup>

107 Our research aims to fill this gap, by conduction a socio-ecological analysis combining spatial data  
108 of the species altogether with information from a structured surveys administered to a sample of  
109 visitors. Our analysis aims to test whether chipmunks became an iconic species and to inspect  
110 patterns in their geographical spread over time, to identify at which stage their invasion might be.

111

## 112 2 MATERIALS AND METHODS

113 In this research we focused on the three urban parks where chipmunks established viable  
114 populations in Italy. The first one is Sigurtà Garden Park, in Valeggio Sul Mincio, where Korean  
115 chipmunks were released in 1978, establishing the largest Italian populations of chipmunks in  
116 Italy.<sup>1, 20-22</sup> The latter two areas where two urban parks in Rome, Villa Ada, where chipmunks were  
117 introduced at multiple times since the early 1908s and Villa Doria-Pamphili, where chipmunks  
118 were observed for the first time in 2018.<sup>6</sup>

119 We surveyed a sample of visitors, administering a structured questionnaire measuring some their  
120 interactions with chipmunks and some psychological drivers of human-chipmunk interactions:  
121 attitudes, emotional dispositions, core affect, existence beliefs, social norms and behavioral  
122 intention about the presence of chipmunks. Attitudes were measured by means of a Likert scale and  
123 they were conceptualized as divided in some beliefs, characterized each one by its strength and the  
124 evaluation of its outcome.<sup>23</sup> The attitudinal scale was built up by considering all the potential  
125 impacts of a species of ground squirrels living in a park, after a pilot study (S1). Emotions were  
126 measured as emotional disposition (joy, fear, surprise, disgust, interest) and core affect, or the extent  
127 respondents would have felt positive or negative at the idea of encountering a chipmunk.<sup>24-27</sup> We

128 measured existence beliefs by asking respondents to rate the importance of chipmunks in the park,  
129 both for future generations and per se.<sup>28</sup> We measured social norms about the appropriateness of  
130 chipmunk presence in the park, by using three items measuring moral beliefs, empirical and  
131 normative expectations, and the willingness to enforce them by reporting the presence of chipmunks  
132 to local authorities.<sup>29</sup> Visitors were also asked whether they had ever heard of chipmunks living in  
133 the park and if they had ever seen, fed or touched them. A complete list of the various questions  
134 adopted in the questionnaire, altogether with their summary is available in Table 1 and a complete  
135 copy of the questionnaire at  
136 ([https://docs.google.com/forms/d/e/1FAIpQLSelkWacunZsTWDB3Qxy3QCYvfaFKg-  
137 hhd9LFmhcLcEZAbyfuA/viewform?usp=sf\\_link](https://docs.google.com/forms/d/e/1FAIpQLSelkWacunZsTWDB3Qxy3QCYvfaFKg-hhd9LFmhcLcEZAbyfuA/viewform?usp=sf_link)). The questionnaires were administered in Rome  
138 in both parks, but the collected data were grouped together as the two parks share the same pool of  
139 visitors. The questionnaire was implemented on GoogleForms. Most respondents (93.95%) were  
140 recruited on the field and they completed the questionnaire on a tablet. An online version was also  
141 administered on some Facebook groups on these urban parks. Questionnaires were confidential and  
142 they took approximately 15 minutes to be filled.

143 We assessed the reliability of our attitudinal scale through McDonald's Omega,<sup>30</sup> and we tested for  
144 construct validity through Confirmatory Factor Analysis (CFA), with a Maximum Likelihood  
145 estimator with robust standard errors and a Satorra-Bentler scaled test statistic. Both indicator and  
146 latent variables were standardized and all the factor loadings were estimated. We adopted two  
147 correlated latent variables reflecting the strength of each beliefs and the evaluation of its outcome  
148 and we also specified some residual correlations between each couple of items describing a specific  
149 impact. We selected the best subset of items and the best latent variable structure by comparing  
150 models through likelihood-ratio testing and some fitness indexes. Attitudes were aggregated into a  
151 final score by summing the product of each couple of items.<sup>23</sup>

152 We segmented respondents on the basis of their attitudes, emotional dispositions, core affect and  
153 their moral, empirical and normative expectations about the presence of chipmunks in the park.

154 Segmentation aimed to identify clusters of respondents who strongly supported chipmunk presence  
155 and could oppose their eradication. We tested for the presence of clusters in the data through the  
156 Hopkins index and we compared k-means, hierarchical and k-medoid cluster analysis<sup>31</sup> to assess  
157 which one clustered observation the best.

158 We carried out Generalized Linear Modeling to highlight differences in the two areas, in terms of  
159 attitudes scores, core affect, existence beliefs and moral, empirical and normative expectations  
160 about the presence of chipmunks in the park. In each model we included a dummy variable  
161 assessing whether respondents encountered chipmunks at least once in their lifetime, and an  
162 interaction term, to account for the effect of past behavior and belief saliency.

163 Finally, we tested for chipmunk expansion outside of their introduction sites by means of  
164 geographic profiling (GP). GP is common in criminology, where the spatial locations of crimes are  
165 used to calculate the probability of occurrence of the offender's residence for each point over a  
166 certain geographical area. GP outperforms classical measures of spatial tendency, and many  
167 ecologists found it good for tracing back the origin of individuals that could move across space.<sup>32-35</sup>

168 We adopted a Bayesian GP algorithm,<sup>36</sup> requiring only the specification of a distribution parameter,  
169 indicating a plausible maximum extent to which individuals could move. Based on available  
170 evidence indicating that chipmunks usually disperse within a few hundred meters from their  
171 birthplace,<sup>37-38</sup> we opted for a dispersal parameter of 1 km. We used available observations collected  
172 in Villa Ada, from 2011 to 2014 (n=26), and in Valeggio sul Mincio, from 1997 to 2018 (n=87), as  
173 the input for the GP algorithm. We did not use observations from Villa Doria-Pamphili as the park  
174 is embedded in an urbanized matrix, which prevents chipmunks from dispersing around. It is  
175 important to note that we were not interested to identify where chipmunks were released, but to  
176 reconstruct a probabilistic profile for the origin of the observations: the inspection of its shape told  
177 us whether observed chipmunks came from disjoint hotspots, as expected for an expanding invasive  
178 alien species, or from a single one, like in the case of a species which is not expanding. Statistical  
179 analyses were carried out with the statistical software R (R Core Team 2018) and a detailed

180 information about statistical analysis, altogether with a reproducible software code is available in  
181 the Supplementary Information (S2).

182

### 183 3 RESULTS AND DISCUSSION

184 Respondents had generally positive emotions towards chipmunks. Moreover, they generally agreed  
185 with the idea that the presence of chipmunks in the park was important for future generations and  
186 that it was important to have chipmunks living in the park even if one does not see them. Finally,  
187 most respondents deemed right and common for chipmunks to live in urban parks (Table 1).  
188 However, most respondents were not aware of the presence of chipmunks in the park where they  
189 were interviewed and about half of them had never observed these animals before. The proportion  
190 of respondents who had fed (14.6%) or touched (6.3%) chipmunks were even lower. Moreover,  
191 14.11% of respondents reported to have observed chipmunks, despite they were not aware of their  
192 presence (Figure 1).

193 CFA and McDonald's Omega did not support an overall attitudinal construct, but they identified  
194 two separate groups of beliefs. The first one included items about the impact of chipmunks over the  
195 quality of recreation at the park: increasing the aesthetic appeal of the park, attracting new visitors  
196 and making visitors more prone to visit the park again. The second group included the potential  
197 impacts of chipmunks over human health: rummaging garbage from bins, transmitting disease to  
198 humans and to visitors' dogs (Table 2; Table 3).

199 Hierarchical cluster analysis with Euclidean distance and a complete link indicated the presence of a  
200 small segment of respondents, characterized by negative attitudes about chipmunk impacts over  
201 human health, fear and disgust towards chipmunks (Figure 2). These could be people who are  
202 scared or disgusted by rodents and concerned about their impact over hygiene, two aspects that are  
203 often related.<sup>39-41</sup>

204 The two sites differed only in respondents' score about the positive impact of chipmunks over the  
205 recreational experience, with Rome having slightly higher scores. Visitors in Rome also agreed



206 slightly more with the idea that most people deemed appropriate for chipmunks to live in urban  
207 parks in Italy (Figure 3; Table 4).

208 Overall, these findings indicate that visitors regard chipmunks positively. Apart from a small cluster  
209 of respondents, most of them have positive emotions towards chipmunks, deem appropriate the fact  
210 that they live in an urban park and value their presence as something having an intrinsic value.  
211 However, this positive perception probably stems from a more general, favorable, disposition  
212 towards the presence of wildlife at urban areas. Respondents do not have a coherent system of  
213 attitudes about the presence of chipmunks, probably because their real interactions were limited:  
214 attitudes are shaped and reinforced by our everyday experience with a certain issue, that make it  
215 salient for ourselves.<sup>23,42</sup> On the other hand, visitors had stable beliefs about those impacts of  
216 chipmunks that could affect their recreational experience at the park, as well as fears about those  
217 impacts that could undermine hygiene. These two sub-dimensions probably indicate that visitors'  
218 beliefs are embedded in broader belief networks encompassing different, and more salient, topics.<sup>43</sup>  
219 For example, our respondents could have stable belief networks diseases, and they could have tied  
220 to them some of their beliefs about chipmunks. Framing experiments, where participants are primed  
221 to think about some precise topics and where the effect of this priming over beliefs is measured<sup>44</sup>  
222 might be a valuable tool to better investigate how human-wildlife interactions are embedded into  
223 broader nomological networks, and influenced by beliefs about relevant social issues. Framing  
224 experiments could also be used to test for attitude certainty and strength.<sup>45,46</sup>

225 The idea that respondents' attitudes were not grounded into experience is reinforced by the limited  
226 interactions between visitors and chipmunks: approximately, only half visitors observed chipmunks  
227 in the park, 15% of them fed chipmunks and only about 6% of them reported to have touched a  
228 chipmunk. Moreover, some visitors who observed chipmunks were not aware of their stable  
229 presence in the park: our questionnaire was arguably the first time they were introduced to this  
230 aspect. These superficial interactions are also reflected by the low differences between the two  
231 areas. Respondents in Rome and in Valeggio sul Mincio had similar scores for almost all the

232 psychological antecedents of their interactions with chipmunks. They showed minor differences  
233 only in their beliefs about the impact of chipmunks over the recreational experience, and in their  
234 normative beliefs about the presence of chipmunks in an urban green area. Moreover, hierarchical  
235 cluster analysis did not divide respondents into meaningful segments, on the basis of their attitudes,  
236 emotions, existence values and social norms towards chipmunks and it did not identify any group of  
237 strong supporters of chipmunks.

238 Taken together, these three points are important for the future management of chipmunks in the  
239 study area. Attitudes are an antecedent of human behavior and often a good barometer to forecast an  
240 eventual opposition to the management of invasive native<sup>23</sup> and introduced wildlife.<sup>47</sup> As visitors do  
241 not have stable attitudes and no segments of highly motivated visitors exist, it is reasonable to say  
242 that an eradication campaign would not face any strong opposition from local visitors. Chipmunks  
243 at the two sites do not seem to be an iconic species yet like the gray squirrel in many urban parks in  
244 the UK.<sup>48</sup> Their interactions with visitors, especially those creating emotional bindings, like feeding,  
245 are still limited. However, considered that respondents regard chipmunks favorably and that they  
246 value their presence as a legacy for the younger generations, we believe that eradication initiatives  
247 should be coupled with an adequate communication strategy, to avoid polarization and the ‘backfire  
248 effect’. Considered that respondents from the two sites did not show any particular difference,  
249 communication actions might be similar for Rome and Valeggio sul Mincio.

250 Geographic profiling confirmed that invasive chipmunks disperse less than 500 m from the place  
251 where they are born. However, while chipmunk observations in Rome come from a single source,  
252 observations in Valeggio sul Mincio are likely to have involved individuals coming from two  
253 distinct spatial cores (Figure 4). One of these two cores was found to be outside of the boundaries of  
254 the urban park where the species was introduced: although slowly, chipmunks are expanding  
255 outside Sigurtà Garden Park, their introduction site in Valeggio sul Mincio. As chipmunks increase  
256 their density we expect them to continue their expansion outside of the park. This perspective is not  
257 encouraging, because Valeggio sul Mincio is surrounded by a countryside environment and

258 cultivations, that might promote chipmunks dispersal at the landscape scale<sup>20</sup> and maybe even their  
259 role as a pest species damaging crops, in the near future. Considered that chipmunks are still  
260 distributed over a relatively small area, but there are large areas in Italy suitable for the species<sup>49,50</sup>,  
261 we recommend their quick removal, as it will be easy and cost-effective.

262

#### 263 4 CONCLUSION

264 In this research, we showed how spatially-explicit data about a biological invasion and survey data  
265 about its social perception can inform decision makers about the feasibility, and the urgency, of  
266 management actions. Geographic profiling can be used not only to identify introduction, or to locate  
267 dens of invasive pests but also to signal the emergence of source-sink systems. These systems  
268 indicate the end of an early invasion stage and the spatial expansion of the invasive alien species,  
269 often due to their numerical increase, which can make eradication or control harder and expensive.  
270 Moreover, structured surveys could inform conservationists about the interactions between  
271 stakeholders and biological invaders, altogether with their social perception.

272 Our findings indicate that visitors still have limited interactions with invasive chipmunks, at the  
273 urban parks in Italy where they have been introduced. They do not have stable attitudes, and there  
274 seems not to be any group of visitors who regard chipmunks as an iconic species. Perspectives  
275 about chipmunks are positive, but probably weak. At the same time, chipmunks are expanding  
276 outside of their introduction site in Northern Italy. We deem that initiatives aimed at removing  
277 chipmunks are still feasible, if properly planned, and urgent. Postponing any management  
278 intervention could complicate eradications, both for the spatial spread of the species in one of the  
279 two areas and for the risk of change in visitors' attitude due to a greater confidence with chipmunks  
280 that have become more abundant.

281

#### 282 ACKNOWLEDGMENTS

283 The "U.O. Manutenzione e Valorizzazione del Verde Urbano" office of the Municipality of Roma

284 provided us with permits to set the survey within urban parks in Rome. Authors would like to thank  
285 Davide Sogliani, who kindly helped in the fieldwork, and Giulia Benassi, who provided them with  
286 data from previous surveys about chipmunks presence in Rome.

287

## 288 5 REFERENCES

- 289 1. Mori E , Zozzoli R, Menchetti M, Global distribution and status of introduced Siberian  
290 chipmunks *Eutamias sibiricus*. *Mammal Rev* **48**:139-152 (2018).
- 291 2. Bertolino S, Introduction of the American grey squirrel (*Sciurus carolinensis*) in Europe: a  
292 case study in biological invasion. *Curr Sci India* **95**:903-906 (2008).
- 293 3. Pisanu B, Marsot M, Marmet J, Chapuis JL, Reale D, Vourc'h G, Introduced Siberian  
294 chipmunks are more heavily infested by ixodid ticks than are native bank voles in a  
295 suburban forest in France. *Int J Parasitol* **40**:1277-1283 (2010).
- 296 4. Marsot M, Chapuis JL, Gasqui P, Dozières A, Massèglia S, Pisanu B, Ferquel E, Vourc'h G,  
297 Introduced Siberian chipmunks (*Tamias sibiricus barberi*) contribute more to Lyme  
298 borreliosis risk than native reservoir rodents. *PLoS One* **8**: e55377 (2013).
- 299 5. Benassi G, Bertolino S, Distribution and activity of the introduced Siberian chipmunk  
300 (Laxmann 1769) in an urban park in Rome, Italy. *Mammalia* **75**:87–90 (2011).
- 301 6. Zozzoli R, Menchetti M, Mori E, Spatial behaviour of an overlooked alien squirrel: the case  
302 of Siberian chipmunks *Eutamias sibiricus*. *Behav Process* **153**:107-111 (2018).
- 303 7. Pluess T, Cannon R, Jarošík V, Pergl J, Pyšek P, Bacher S, When are eradication campaigns  
304 successful? A test of common assumptions. *Biol Invasions* **14**:1365-1378 (2012).
- 305 8. Bomford M, O'Brien P, Eradication or control for vertebrate pests? *Wildlife Soc B* **23**:249-  
306 255 (1995).
- 307 9. Robertson PA, Adriaens T, Lambin X, Mill A, Roy S, Shuttleworth CM, Sutton-Croft M,  
308 The large-scale removal of mammalian invasive alien species in Northern Europe. *Pest*  
309 *Manag Sci* **73**:273-279 (2016).

- 310 10. McNeely JA, The great reshuffling: human dimensions of invasive alien species The great  
311 reshuffling: human dimensions of invasive alien species. Workshop on the Human  
312 Dimensions of Invasive Alien Species, Cape Town, ZA, 15-17 September 2000: 213-237  
313 (2001).
- 314 11. Blackburn TM, Pettorelli N, Katzner T, Gompper ME, Mock K, Garner TWJ, Altwegg R,  
315 Redpath S, Gordon IJ , Dying for conservation: eradicating invasive alien species in the face  
316 of opposition. *Anim Conserv* **13**:227-228 (2010).
- 317 12. Shine R, Doody JS, Invasive species control: understanding conflicts between researchers  
318 and the general community. *Front Ecol Environ* **9**: 400-406 (2011).
- 319 13. Bertolino S, Genovesi P, Spread and attempted eradication of the grey squirrel (*Sciurus*  
320 *carolinensis*) in Italy, and consequences for the red squirrel (*Sciurus vulgaris*) in Eurasia.  
321 *Biol Conserv* **109**: 351-358 (2003).
- 322 14. Crowley SL, Hinchliffe S, McDonald RA, Conflict in invasive species management. *Front*  
323 *Ecol Environ* **15**: 133-141 (2017).
- 324 15. Crowley SL, Hinchliffe S, McDonald RA, Invasive species management will benefit from  
325 social impact assessment. *J Appl Ecol* **54**: 351-357 (2017).
- 326 16. Gálvez N, Guillera-Arroita G, St. John FA, Schüttler E, Macdonald DW, Davies ZG, A  
327 spatially integrated framework for assessing socioecological drivers of carnivore decline. *J*  
328 *Appl Ecol* **55**:1393-1405 (2018).
- 329 17. Struebig MJ, Linkie M, Deere NJ, Martyr DJ, Millyanawati B, Faulkner SC, Le Comber SC,  
330 Mangunjaya FM, Leader-Williams N, McKay JE, St. John FA, Addressing human-tiger  
331 conflict using socio-ecological information on tolerance and risk. *Nat Commun* **9**:3455  
332 (2018).
- 333 18. Genovesi P, Bertolino S, Human dimension aspects in invasive alien species issues: the case  
334 of the failure of the grey squirrel eradication project in Italy. In: McNeely JA (Eds) The

- 335 Great Reshuffling: human dimensions of Invasive Alien Species. IUCN, Gland, Switzerland  
336 and Cambridge, UK, Vi + 242 pp: 113-119 (2001).
- 337 19. La Morgia V, Paoloni D, Genovesi P, Eradicating the grey squirrel *Sciurus carolinensis* from  
338 urban areas: an innovative decision-making approach based on lessons learnt in Italy. *Pest*  
339 *Manag Sci* **73**:354-363 (2017).
- 340 20. Mori E, Zozzoli R, Mazza G, Coming in like a wrecking-ball: are native Eurasian red  
341 squirrels displacing invasive Siberian chipmunks? A study from an urban park. *Urban*  
342 *Ecosyst* **21**:975–981 (2018).
- 343 21. Mori E, Milanesi P, Menchetti M, Zozzoli R, Monaco A, Capizzi D, Nerva L, Genetics  
344 reveals that free-ranging chipmunks introduced to Italy have multiple origins. *Hystrix* DOI:  
345 10.4404/hystrix-00116-2018 (2018).
- 346 22. Mori E, Menchetti M, Zozzoli R, Milanesi P, The importance of taxonomy in species  
347 distribution models at a global scale: the case of an overlooked alien squirrel facing  
348 taxonomic revision. *J Zool* **307**:43-52 (2019).
- 349 23. Manfredo MJ, Who cares about wildlife? Springer, New York, NY, USA: 1-2 (2008).
- 350 24. Jacobs MH, Human emotions toward wildlife. *Hum Dimens Wildl* **17**:1-3 (2012).
- 351 25. Jacobs MH, Vaske JJ, Roemer JM, Toward a mental systems approach to human  
352 relationships with wildlife: the role of emotional dispositions. *Hum Dimens Wildl* **17**:4-15  
353 (2012).
- 354 26. Jacobs MH, Vaske JJ, Dubois S, Fehres P, More than fear: role of emotions in acceptability  
355 of lethal control of wolves. *Eur J Wildlife Res* **60**:589-598 (2014).
- 356 27. Larson LR, Cooper CB, Hauber ME, Emotions as drivers of wildlife stewardship behavior:  
357 Examining citizen science nest monitors' responses to invasive house sparrows. *Hum*  
358 *Dimens Wildl* **21**:18-33 (2016).
- 359 28. Frank B, Glikman JA, Sutherland M, Bath AJ, Predictors of extreme negative feelings  
360 toward coyote in Newfoundland. *Hum Dimens Wildl* **21**:297-310 (2016).

- 361 29. Bicchieri C, Norms in the wild: How to diagnose, measure, and change social norms.  
362 Oxford University Press, Oxford, UK (2016).
- 363 30. Dunn TJ, Baguley T, Brunsten V, From alpha to omega: A practical solution to the pervasive  
364 problem of internal consistency estimation. *Brit J Psychol* **105**:399-412 (2014).
- 365 31. Kassambara A, Practical guide to cluster analysis in R. CreateSpace: North Charleston,  
366 South Carolina, USA (2017).
- 367 32. Raine NE, Rossmo DK, Le Comber SC, Geographic profiling applied to testing models of  
368 bumble-bee foraging. *J R Soc Interface* **6**:307-319 (2008).
- 369 33. Martin RA, Rossmo DK, Hammerschlag N, Hunting patterns and geographic profiling of  
370 white shark predation. *Journal of Zoology (London)* **279**: 111-118 (2009).
- 371 34. Faulkner SC, Stevenson MD, Verity R, Mustari AH, Semple S, Tosh DG, Le Comber SC,  
372 Using geographic profiling to locate elusive nocturnal animals: a case study with spectral  
373 tarsiers. *J Zool* **295**: 261-268 (2015).
- 374 35. Faulkner SC, Verity R, Roberts D, Roy SS, Robertson PA, Stevenson MD, Le Comber SC,  
375 Using geographic profiling to compare the value of sightings vs trap data in a biological  
376 invasion. *Divers Distrib* **23**:104-112 (2017).
- 377 36. Verity R, Stevenson MD, Rossmo DK, Nichols RA, Le Comber SC, Spatial targeting of  
378 infectious disease control: identifying multiple, unknown sources. *Methods Ecol Evol* **5**:647-  
379 655 (2014).
- 380 37. Marmet J, Pisanu B, Chapuis JL, Home range, range overlap, and site fidelity of introduced  
381 Siberian chipmunks in a suburban French forest. *Eur J Wildlife Res* **55**:497-504 (2009).
- 382 38. Marmet J, Pisanu B, Chapuis JL, Natal dispersal of introduced Siberian chipmunks, *Tamias*  
383 *sibiricus*, in a suburban forest. *J Ethol* **29**:23-29 (2012).
- 384 39. Davey GC, Macdonald BA, Brierley L, The effect of disgust on anxiety ratings to fear-  
385 relevant, disgust-relevant and fear-irrelevant stimuli. *J Anxiety Disord* **22**:1347-1354 (2008).

- 386 40. Curtis V, Aunger R, Rabie T, Evidence that disgust evolved to protect from risk of disease. *P*  
387 *R Soc B-Biol Sci* **271**:S131-S133 (2004).
- 388 41. Prokop P, Usak M, Fančovičová J, Risk of parasite transmission influences perceived  
389 vulnerability to disease and perceived danger of disease-relevant animals. *Behav Process*  
390 **85**:52-57 (2010).
- 391 42. Heberlein TA, Navigating Environmental Attitudes. Oxford University Press, Oxford, UK  
392 (2012).
- 393 43. Nilsson NJ, Understanding beliefs. MIT (Massachusetts Institute of Technology) Press,  
394 Cambridge, Massachusetts, USA (2014).
- 395 44. Chong D, Druckman JN, Framing theory. *Annu Rev Polit Sci* **10**:103-126 (2007).
- 396 45. Howe LC, Krosnick JA, Attitude strength. *Annu Rev Psychol* **68**:327-351 (2017).
- 397 46. Rucker DD, Petty RE, Briñol P, What's in a frame anyway? A meta-cognitive analysis of the  
398 impact of one versus two sided message framing on attitude certainty. *J Consum Psychol*  
399 **18**:137-149 (2008).
- 400 47. Sharp RL, Larson LR, Green GT, Factors influencing public preferences for invasive alien  
401 species management. *Biol Conserv* **144**:2097-2104 (2011).
- 402 48. Dunn M, Marzano M, Forster J, Gill RM, Public attitudes towards “pest” management:  
403 Perceptions on squirrel management strategies in the UK. *Biol Conserv* **222**:52-63 (2018).
- 404 49. Di Febbraro M, Martinoli A, Russo D, Preatoni D, Bertolino S, Modelling the effects of  
405 climate change on the risk of invasion by alien squirrels. *Hystrix* **27**:22–29 (2016).
- 406 50. Di Febbraro M, Menchetti M, Russo D, Ancillotto L, Aloise G, Roscioni F, Preatoni DG,  
407 Loy A, Martinoli A, Bertolino S, Mori E, Integrating climate and land–use change scenarios  
408 in modelling the future spread of invasive squirrels in Italy. *Divers Distrib*, DOI:  
409 10.1111/ddi.12890 (2019).



410 **Figure legends**

411

412 Figure 1. Sankey plot about visitors-chipmunks interactions.

413

414 Figure 2. Dendrogram of the hierarchical cluster analysis.

415

416 Figure 3. Marginal effects of the GLM, based on a Gamma distribution of the error and an identity  
417 link: average scores of normative expectations in the two areas, both for respondents who had  
418 observed chipmunks (blue) and for respondents who didn't (red).

419

420 Figure 4. Location of the three study sites (left), heatmap with the posterior probabilities of the  
421 origins of observed tamias (center) and posterior probability of the dispersal parameter (right).

## 422 TABLES

423 Table 1. Questionnaire structure, item summary and completion rate.

| Construct                                                                                   | Format                                                                | Question                                                                                      | Mean $\pm$ SD    |
|---------------------------------------------------------------------------------------------|-----------------------------------------------------------------------|-----------------------------------------------------------------------------------------------|------------------|
| Belief strength                                                                             | Bipolar scale, from “Strongly disagree” (-3) to “Strongly agree” (+3) | <i>Nowadays the presence of chipmunks in an urban park would...</i>                           | 0.55 $\pm$ 1.57  |
|                                                                                             |                                                                       | ... improve its overall environmental quality.                                                |                  |
|                                                                                             |                                                                       | ... make it more aesthetically appealing.                                                     | 1.14 $\pm$ 1.50  |
|                                                                                             |                                                                       | ... lead people who already visited the park to return there more often.                      | 1.35 $\pm$ 1.34  |
|                                                                                             |                                                                       | ... attract new visitors.                                                                     | 1.43 $\pm$ 1.31  |
|                                                                                             |                                                                       | ... make visiting the park a more satisfying experience.                                      | 1.69 $\pm$ 1.39  |
|                                                                                             |                                                                       | ... cause disease transmission to visitors.                                                   | -1.18 $\pm$ 1.64 |
|                                                                                             |                                                                       | ... cause disease transmission to the dogs which are walked in the park.                      | -1.04 $\pm$ 1.48 |
|                                                                                             |                                                                       | ... cause damaging to the vegetation of the park.                                             | -1.04 $\pm$ 1.57 |
|                                                                                             |                                                                       | ... cause nest depredation on those birds that breed there.                                   | -0.61 $\pm$ 1.68 |
| ... affect garbage disposal, as chipmunks could rummage it around while searching for food. | -0.88 $\pm$ 1.58                                                      |                                                                                               |                  |
| Evaluation of each belief                                                                   | Unipolar scale from with 7 degrees, from “Bad” to “Good”              | <i>“How would you evaluate the following consequences of chipmunks presence in the park?”</i> | 1.73 $\pm$ 1.86  |
|                                                                                             |                                                                       | The park improves its environmental quality.                                                  |                  |
|                                                                                             |                                                                       | The park becomes more aesthetically appealing.                                                | 2.02 $\pm$ 1.40  |
|                                                                                             |                                                                       | People who already visited the park, now return there                                         | 1.65 $\pm$ 1.48  |

|                                   |                                                                             |                                                                                                                                                                                                        |              |
|-----------------------------------|-----------------------------------------------------------------------------|--------------------------------------------------------------------------------------------------------------------------------------------------------------------------------------------------------|--------------|
|                                   |                                                                             | more often.                                                                                                                                                                                            |              |
|                                   |                                                                             | New people come to see the park.                                                                                                                                                                       | 1.93 ± 1.30  |
|                                   |                                                                             | Visiting the park becomes a more satisfying experience.                                                                                                                                                | 1.76 ± 1.41  |
|                                   |                                                                             | Chipmunks transmit diseases to visitors.                                                                                                                                                               | -2.20 ± 1.22 |
|                                   |                                                                             | Chipmunks transmit diseases to the dogs which are walked in the park.                                                                                                                                  | -2.08 ± 1.18 |
|                                   |                                                                             | The vegetation of the park is damaged by chipmunks.                                                                                                                                                    | -1.71 ± 1.43 |
|                                   |                                                                             | Chipmunks prey on the nests of the birds that breed in the park.                                                                                                                                       | -1.67 ± 1.34 |
|                                   |                                                                             | Chipmunks rummage the garbage around garbage bins, while searching for food.                                                                                                                           | -1.60 ± 1.19 |
| Core affect                       | Bipolar scale, from “Extremely negative” (-3) to “Extremely positive ” (+3) | <p><i>“Use the following scale to describe how you would feel about living each one of these experience”.</i></p> <p>Spotting one, or more, chipmunks, while strolling in the park.</p>                | 0.97 ± 0.18  |
| Emotional disposition (Happiness) | Bipolar scale, from “Extremely negative” (-3) to “Extremely positive ” (+3) | <p><i>“Could you please tell us to what extend you agree or disagree with the following statements?”</i></p> <p>I would feel happy, if I spotted some chipmunks when I go to the park. (Happiness)</p> | 1.51 ± 1.48  |
|                                   |                                                                             | I would feel scared, if I spotted some chipmunks when I go to the park. (Fear)                                                                                                                         | -2.55 ± 1.11 |
|                                   |                                                                             | I would be surprised, if I spotted some chipmunks when I go to the park. (Surprise)                                                                                                                    | 0.24 ± 1.93  |
|                                   |                                                                             | I would feel disgusted, if I spotted some chipmunks when I go to the park. (Disgust)                                                                                                                   | -2.46 ± 1.18 |
|                                   |                                                                             | I would feel interested, if I spotted some chipmunks                                                                                                                                                   | 1.48 ± 1.54  |

|                                                                                        |                                                                             |                                                                                                                                                                                                                               |                          |
|----------------------------------------------------------------------------------------|-----------------------------------------------------------------------------|-------------------------------------------------------------------------------------------------------------------------------------------------------------------------------------------------------------------------------|--------------------------|
|                                                                                        |                                                                             | when I go to the park. (Interest)                                                                                                                                                                                             |                          |
| Existence beliefs                                                                      | Bipolar scale, from “Extremely negative” (-3) to “Extremely positive ” (+3) | <p><i>“To what extend do you agree with the following statements?”</i></p> <p>It is important to maintain the presence of chipmunks in the park, for future generations.</p>                                                  | 1.25 ± 1.83              |
|                                                                                        |                                                                             | <p>Whether or not I would get to see chipmunks in the park, it is important to me that they live there.</p>                                                                                                                   | 1.12 ± 1.74              |
| Moral beliefs                                                                          | Bipolar scale, from “Extremely negative” (-3) to “Extremely positive ” (+3) | <p><i>“To what extend do you agree with the following statements?”</i></p> <p>Chipmunks should not be allowed to live in an urban green space, like a park.</p>                                                               | 1.28 ± 1.60              |
| Empirical expectations                                                                 | Bipolar scale, from “Extremely negative” (-3) to “Extremely positive ” (+3) | <p><i>“To what extend do you agree with the following statements?”</i></p> <p>I expect that most chipmunks living in Italy inhabit urban parks; (empirical expectations).</p>                                                 | 0.94 ± 1.50              |
| Normative expectations                                                                 | Bipolar scale, from “Extremely negative” (-3) to “Extremely positive ” (+3) | <p><i>“To what extend do you agree with the following statements?”</i></p> <p>I expect most people to believe that chipmunks should be allowed to lived in an urban green space, like the park; (normative expectations).</p> | 1.13 ± 1.37              |
| Perceived willingness to report chipmunks presence to local authorities (other people) | Dichotomous (Yes/No)                                                        | I expect most people to report chipmunks to local authorities, if they found they were living in an urban park.                                                                                                               | Yes = 4.03%, No = 95.67% |
| Personal comittment to report chipmunks presence to local                              | Dichotomous (Yes/No)                                                        | I would report chipmunks to local authorities, if they found they were living in an urban park.                                                                                                                               | Yes = 9.27%, No = 90.73% |

|                                           |                                                                                                      |                                                                                                         |                                                                                                         |
|-------------------------------------------|------------------------------------------------------------------------------------------------------|---------------------------------------------------------------------------------------------------------|---------------------------------------------------------------------------------------------------------|
| authorities                               |                                                                                                      |                                                                                                         |                                                                                                         |
| Awareness about the presence of chipmunks | Dichotomous (Yes/No)                                                                                 | Prior to this survey, have you ever heard that some chipmunks inhabited the park?                       | Yes = 41.12%, No = 58.87%                                                                               |
| Experience with chipmunks                 | Ordered scale (Multiple times per week; Multiple times per month; Once; Never)                       | “ <i>Could you please tell us how often did you have the following experiences at the park?</i> ”       | Never = 50.40%<br>Once = 27.82%<br>Multiple times per month = 16.12%<br>Multiple times per week = 5.64% |
|                                           |                                                                                                      | Spotting one, or more, chipmunks at the park.                                                           |                                                                                                         |
|                                           |                                                                                                      | Feeding the chipmunks at the park.                                                                      | Never = 85.48%<br>Once = 10.09%<br>Multiple times per month = 2.82%<br>Multiple times per week = 1.61%  |
|                                           |                                                                                                      | Touching, or caressing, a chipmunks at the park.                                                        | Never = 94.76%<br>Once = 4.03%<br>Multiple times per month = 0.40%<br>Multiple times per week = 0.80%   |
| Park usage                                | Dichotomous (Yes/No)                                                                                 | “ <i>Could you please tell us which of the following activities you usually practice at the park?</i> ” | Yes = 0.28, No = 0.72                                                                                   |
|                                           |                                                                                                      | Sport (e.g jogging, cycling, football, volley).                                                         |                                                                                                         |
|                                           |                                                                                                      | Birdwatching.                                                                                           | Yes = 6.85, No = 93.15%                                                                                 |
|                                           |                                                                                                      | Strolling.                                                                                              | Yes = 79.43%, No = 20.57%                                                                               |
|                                           |                                                                                                      | Picnicking.                                                                                             | Yes = 22.98%, No = 77.02%                                                                               |
|                                           |                                                                                                      | Walking the dog.                                                                                        | Yes = 24.19%, No = 75.81%                                                                               |
|                                           |                                                                                                      | Painting / photography.                                                                                 | Yes = 25.80%, No = 74.19%                                                                               |
|                                           |                                                                                                      | Playing a musical instrument.                                                                           | Yes = 4.43%, No = 93.57%                                                                                |
|                                           |                                                                                                      | Feeding animals.                                                                                        | Yes = 6.04%, No = 93.96%                                                                                |
|                                           |                                                                                                      | Working or volunteering.                                                                                | Yes = 2.82%, No = 97.18%                                                                                |
| Age                                       | Ordered scale (15-20 years, 21-30 years, 31-40 years, 41-50 years, 51-65 years, more than 65 years ) | Could you please tell us in which year were you born?                                                   | 15-20 years = 10.5%,<br>21-30 years = 29.44 %<br>31-40 years = 22.98 %                                  |

|           |                           |                                                                                                  |                                                                                                               |
|-----------|---------------------------|--------------------------------------------------------------------------------------------------|---------------------------------------------------------------------------------------------------------------|
|           |                           |                                                                                                  | 41-50 years = 19.75 %<br>51-65 years = 10.88 %<br>more than 65 years = 6.5%                                   |
| Sex       | Dichotomous (Male/Female) | <i>We know that sex and gender are not the same concept. Could please just tell us your sex?</i> | Male = 50.81%<br>Female = 49.29%                                                                              |
| Education | Ordered scale             | <i>Which is your level of education?</i>                                                         | Elementary school = 1.61%<br>Secondary school = 8.47 %<br>High school = 41.94 %<br>University degree = 47.98% |

424 Table 2. Confirmatory Factor Analysis, model comparison.

| Beliefs about chipmunks' impact over the recreational quality of the park. |                                                                          |                                                                                                           |                                                                                                           |
|----------------------------------------------------------------------------|--------------------------------------------------------------------------|-----------------------------------------------------------------------------------------------------------|-----------------------------------------------------------------------------------------------------------|
|                                                                            | Full model                                                               | Model without the items about the "Environmental quality"                                                 | Model without the items about the "Environmental quality" and the "Visitors' satisfaction"                |
| SRMR                                                                       | 0.04213852                                                               | 0.03863779                                                                                                | 0.03520523                                                                                                |
| RMR                                                                        | 0.04196861                                                               | 0.03848199                                                                                                | 0.03506327                                                                                                |
| TLI                                                                        | 0.9477260                                                                | 0.9502502                                                                                                 | 0.9739350                                                                                                 |
| CFI                                                                        | 0.9663123                                                                | 0.9733483                                                                                                 | 0.9913117                                                                                                 |
| IFI                                                                        | 0.9666189                                                                | 0.9735970                                                                                                 | 0.9914187                                                                                                 |
| ECVI                                                                       | 0.5632614                                                                | 0.3781471                                                                                                 | 0.1772727                                                                                                 |
| BIC                                                                        | 5471.809                                                                 | 4381.852                                                                                                  | 3500.436                                                                                                  |
| AIC                                                                        | 5380.460                                                                 | 4308.070                                                                                                  | 3444.221                                                                                                  |
| BIC2                                                                       | 5389.389                                                                 | 4315.282                                                                                                  | 3449.716                                                                                                  |
| GFI                                                                        | 0.9341394                                                                | 0.9495378                                                                                                 | 0.9838887                                                                                                 |
| AGFI                                                                       | 0.8750919                                                                | 0.8788907                                                                                                 | 0.9323327                                                                                                 |
| PGFI                                                                       | 0.4925462                                                                | 0.3956407                                                                                                 | 0.2342592                                                                                                 |
| MFI                                                                        | 0.8884080                                                                | 0.9285285                                                                                                 | 0.9860585                                                                                                 |
| Scaled chi-squared difference test                                         | df = 5, AIC = 3444.2, BIC = 3500.4, chisq = 11.964                       | df = 15, AIC = 4308.1, BIC = 4381.9, chisq = 51.781, chisq.diff = 28.519, df.diff = 10, p-value = 0.00149 | df = 29, AIC = 5380.5, BIC = 5471.8, chisq = 87.689, chisq.diff = 24.250, df.diff = 14, p-value = 0.04274 |
| Cronbach's alpha                                                           | 0.93                                                                     | 0.92                                                                                                      | 0.88                                                                                                      |
| McDonald's Omega                                                           | Omega Hierarchical = 0.74, Omega H asymptotic = 0.78, Omega Total = 0.95 | Omega Hierarchical = 0.76, Omega H asymptotic = 0.81, Omega Total = 0.95                                  | Omega Hierarchical = 0.68, Omega H asymptotic = 0.73, Omega Total = 0.93                                  |
| Beliefs about chipmunks' impact over the hygiene of the park.              |                                                                          |                                                                                                           |                                                                                                           |
|                                                                            | Full model                                                               | Model without the items about the "Vegetation damaging"                                                   | Model without the items about the "Nest depredation"                                                      |
| SRMR                                                                       | 0.06205949                                                               | 0.05537003                                                                                                | 0.03495205                                                                                                |
| RMR                                                                        | 0.06180925                                                               | 0.05514676                                                                                                | 0.03481111                                                                                                |
| TLI                                                                        | 0.8835495                                                                | 0.9502502                                                                                                 | 0.9742254                                                                                                 |
| CFI                                                                        | 0.9249541                                                                | 0.9733483                                                                                                 | 0.9914085                                                                                                 |
| IFI                                                                        | 0.9265352                                                                | 0.9735970                                                                                                 | 0.9916257                                                                                                 |

|                                    |                                                                         |                                                                                                             |                                                                                                             |
|------------------------------------|-------------------------------------------------------------------------|-------------------------------------------------------------------------------------------------------------|-------------------------------------------------------------------------------------------------------------|
| ECVI                               | 0.5515900                                                               | 0.3781471                                                                                                   | 0.1625515                                                                                                   |
| BIC                                | 6467.589                                                                | 4381.852                                                                                                    | 3912.691                                                                                                    |
| AIC                                | 6376.239                                                                | 4308.070                                                                                                    | 3856.477                                                                                                    |
| BIC2                               | 6385.168                                                                | 4315.282                                                                                                    | 3861.971                                                                                                    |
| GFI                                | 0.9386140                                                               | 0.9495378                                                                                                   | 0.9888453                                                                                                   |
| AGFI                               | 0.9386140                                                               | 0.9495378                                                                                                   | 0.9888453                                                                                                   |
| PGFI                               | 0.4949056                                                               | 0.3956407                                                                                                   | 0.2354394                                                                                                   |
| MFI                                | 0.8936076                                                               | 0.9285285                                                                                                   | 0.9933433                                                                                                   |
| Scaled chi-squared difference test | df = 5, AIC = 3856.5, BIC = 3912.7, chisq = 8.3128                      | df = 15, AIC = 5146.0, BIC = 5219.8, chisq = 32.8162, chisq.diff = 16.867, df.diff = 10, p-value = 0.077360 | df = 29, AIC = 6376.2, BIC = 6467.6, chisq = 84.7943, chisq.diff = 37.521, df.diff = 14, p-value = 0.000615 |
| Cronbach's alpha                   | 0.79                                                                    | 0.74                                                                                                        | 0.74                                                                                                        |
| McDonald's Omega                   | Omega Hierarchical = 0.4, Omega H asymptotic = 0.47, Omega Total = 0.85 | Omega Hierarchical = 0.42, Omega H asymptotic = 0.51, Omega Total = 0.82                                    | Omega Hierarchical = 0.43, Omega H asymptotic = 0.52, Omega Total = 0.83                                    |



425 Table 3. Confirmatory Factor Analysis: factor loadings, covariances, variances and communalities.

| Beliefs about chipmunks' impact over the recreational quality of the park.        |                                           |          |       |         |         |
|-----------------------------------------------------------------------------------|-------------------------------------------|----------|-------|---------|---------|
| Factor loadings                                                                   |                                           |          |       |         |         |
|                                                                                   |                                           | Estimate | S.E   | z-value | p-value |
| Strength of the belief                                                            | Aesthetic quality                         | 0.697    | 0.076 | 9.188   | 0.000   |
|                                                                                   | Increased visits in the near future       | 0.809    | 0.076 | 10.589  | 0.000   |
|                                                                                   | Increase in the number of visitors        | 0.799    | 0.081 | 9.850   | 0.000   |
| Evaluation of the outcomes                                                        | Aesthetic quality                         | 0.874    | 0.084 | 10.409  | 0.000   |
|                                                                                   | Increased visits in the near future       | 0.840    | 0.076 | 10.999  | 0.000   |
|                                                                                   | Increase in the number of visitors        | 0.840    | 0.093 | 9.036   | 0.000   |
| Covariances between the strength of each belief and the evaluation of its outcome |                                           |          |       |         |         |
|                                                                                   | Latent constructs (Strength x Evaluation) | 0.684    | 0.070 | 9.807   | 0.000   |
|                                                                                   | Aesthetic quality                         | 0.017    | 0.041 | 0.408   | 0.683   |
|                                                                                   | Increased visits in the near future       | 0.093    | 0.041 | 2.300   | 0.021   |
|                                                                                   | Increase in the number of visitors        | 0.036    | 0.040 | 0.893   | 0.372   |
| Variances                                                                         |                                           |          |       |         |         |
| Strength of the belief                                                            | Aesthetic quality                         | 0.510    | 0.086 | 5.951   | 0.000   |
|                                                                                   | Increased visits in the near future       | 0.340    | 0.073 | 4.625   | 0.000   |
|                                                                                   | Increase in the number of visitors        | 0.357    | 0.068 | 5.250   | 0.000   |
| Evaluation of the                                                                 | Aesthetic                                 | 0.227    | 0.074 | 3.058   | 0.002   |

|                                                                                   |                                                                         |                                                                        |                                                           |                                                                             |                                                                            |
|-----------------------------------------------------------------------------------|-------------------------------------------------------------------------|------------------------------------------------------------------------|-----------------------------------------------------------|-----------------------------------------------------------------------------|----------------------------------------------------------------------------|
| outcomes                                                                          | quality                                                                 |                                                                        |                                                           |                                                                             |                                                                            |
|                                                                                   | Increased visits in the near future                                     | 0.298                                                                  | 0.059                                                     | 5.037                                                                       | 0.000                                                                      |
|                                                                                   | Increase in the number of visitors                                      | 0.296                                                                  | 0.067                                                     | 4.410                                                                       | 0.000                                                                      |
| Communalities                                                                     |                                                                         |                                                                        |                                                           |                                                                             |                                                                            |
| Strength of the belief: aesthetic quality = 0.4879791                             | Strength of the belief: increased visits in the near future = 0.6580856 | Strength of the belief: increase in the number of visitors = 0.6409658 | Evaluation of the outcomes: aesthetic quality = 0.7709439 | Evaluation of the outcomes: increased visits in the near future = 0.7031584 | Evaluation of the outcomes: increase in the number of visitors = 0.7043100 |
| Beliefs about chipmunks' impact over the hygiene of the park.                     |                                                                         |                                                                        |                                                           |                                                                             |                                                                            |
| Factor loadings                                                                   |                                                                         |                                                                        |                                                           |                                                                             |                                                                            |
|                                                                                   |                                                                         | Estimate                                                               | S.E                                                       | z-value                                                                     | p-value                                                                    |
| Strength of the belief                                                            | Disease transmission to visitors                                        | 0.878                                                                  | 0.067                                                     | 13.016                                                                      | 0.000                                                                      |
|                                                                                   | Disease transmission to visitors' dogs                                  | 0.771                                                                  | 0.062                                                     | 12.407                                                                      | 0.000                                                                      |
|                                                                                   | Garbage rummaging                                                       | 0.540                                                                  | 0.070                                                     | 7.672                                                                       | 0.000                                                                      |
| Evaluation of the outcomes                                                        | Disease transmission to visitors                                        | 0.678                                                                  | 0.089                                                     | 7.664                                                                       | 0.000                                                                      |
|                                                                                   | Disease transmission to visitors' dogs                                  | 0.865                                                                  | 0.096                                                     | 9.025                                                                       | 0.000                                                                      |
|                                                                                   | Garbage rummaging                                                       | 0.438                                                                  | 0.096                                                     | 4.543                                                                       | 0.000                                                                      |
| Covariances between the strength of each belief and the evaluation of its outcome |                                                                         |                                                                        |                                                           |                                                                             |                                                                            |
|                                                                                   | Latent constructs (Strength x Evaluation)                               | 0.335                                                                  | 0.084                                                     | 3.992                                                                       | 0.000                                                                      |
|                                                                                   | Disease                                                                 | 0.039                                                                  | 0.042                                                     | 0.929                                                                       | 0.353                                                                      |

|                                                                      |                                                                            |                                                       |                                                                          |                                                                                |                                                           |
|----------------------------------------------------------------------|----------------------------------------------------------------------------|-------------------------------------------------------|--------------------------------------------------------------------------|--------------------------------------------------------------------------------|-----------------------------------------------------------|
|                                                                      | transmission to visitors                                                   |                                                       |                                                                          |                                                                                |                                                           |
|                                                                      | Disease transmission to visitors' dogs                                     | -0.025                                                | 0.042                                                                    | -0.596                                                                         | 0.551                                                     |
|                                                                      | Garbage rummaging                                                          | 0.057                                                 | 0.067                                                                    | 0.849                                                                          | 0.396                                                     |
| Variances                                                            |                                                                            |                                                       |                                                                          |                                                                                |                                                           |
| Strength of the belief                                               | Disease transmission to visitors                                           | 0.228                                                 | 0.089                                                                    | 2.553                                                                          | 0.011                                                     |
|                                                                      | Disease transmission to visitors' dogs                                     | 0.404                                                 | 0.076                                                                    | 5.308                                                                          | 0.000                                                     |
|                                                                      | Garbage rummaging                                                          | 0.709                                                 | 0.077                                                                    | 9.175                                                                          | 0.000                                                     |
| Evaluation of the outcomes                                           | Disease transmission to visitors                                           | 0.532                                                 | 0.153                                                                    | 3.479                                                                          | 0.001                                                     |
|                                                                      | Disease transmission to visitors' dogs                                     | 0.243                                                 | 0.130                                                                    | 1.870                                                                          | 0.061                                                     |
|                                                                      | Garbage rummaging                                                          | 0.802                                                 | 0.109                                                                    | 7.385                                                                          | 0.000                                                     |
| Communalities                                                        |                                                                            |                                                       |                                                                          |                                                                                |                                                           |
| Strength of the belief: disease transmission to visitors = 0.7721118 | Strength of the belief: disease transmission to visitors' dogs = 0.5953521 | Strength of the belief: garbage rummaging = 0.2915509 | Evaluation of the outcomes: disease transmission to visitors = 0.4637312 | Evaluation of the outcomes: disease transmission to visitors' dogs = 0.7546028 | Evaluation of the outcomes: garbage rummaging = 0.1927527 |

426  
427  
428  
429  
430  
431  
432  
433  
434  
435  
436  
437  
438  
439  
440  
441  
442

443  
444  
445  
446  
447  
448  
449  
450

Table 4. Output of the Generalized Linear Model. Normative expectations were measured on a rescaled bipolar Likert scales, ranging from 1 to 7.

| Response variable: normative expectations about chipmunks presence. |          |                            |         |              |
|---------------------------------------------------------------------|----------|----------------------------|---------|--------------|
| Predictor                                                           | Estimate | S.E.                       | t-value | p-value      |
| Intercept                                                           | 5.57407  | 0.19862                    | 28.063  | <2e-16 ***   |
| Location                                                            | -0.64550 | 0.25149                    | -2.567  | 0.0109 *     |
| Previous experience with chipmunks                                  | 0.04131  | 0.30804                    | 0.134   | 0.8934       |
| Location * Previous experience                                      | -0.16988 | 0.37050                    | -0.459  | 0.6470       |
| Null deviance = 24.126                                              |          | Residual deviance = 22.937 |         | AIC = 914.39 |

451

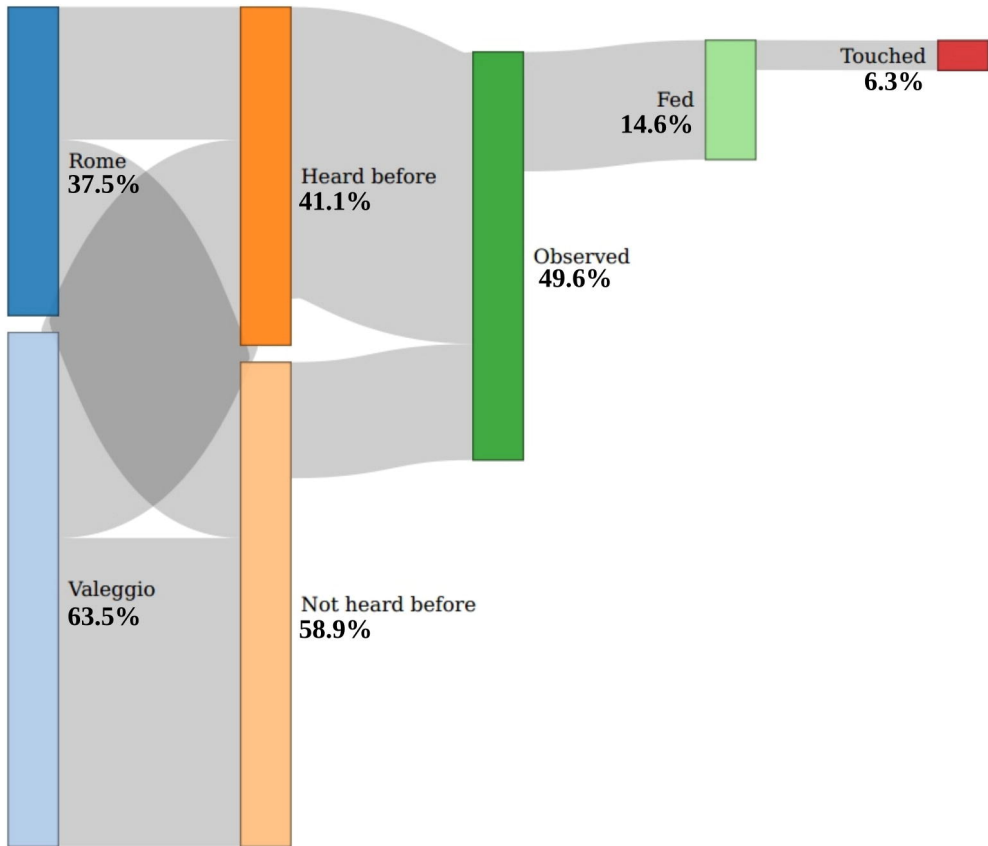

# Cluster dendrogram with AU/BP values (%)

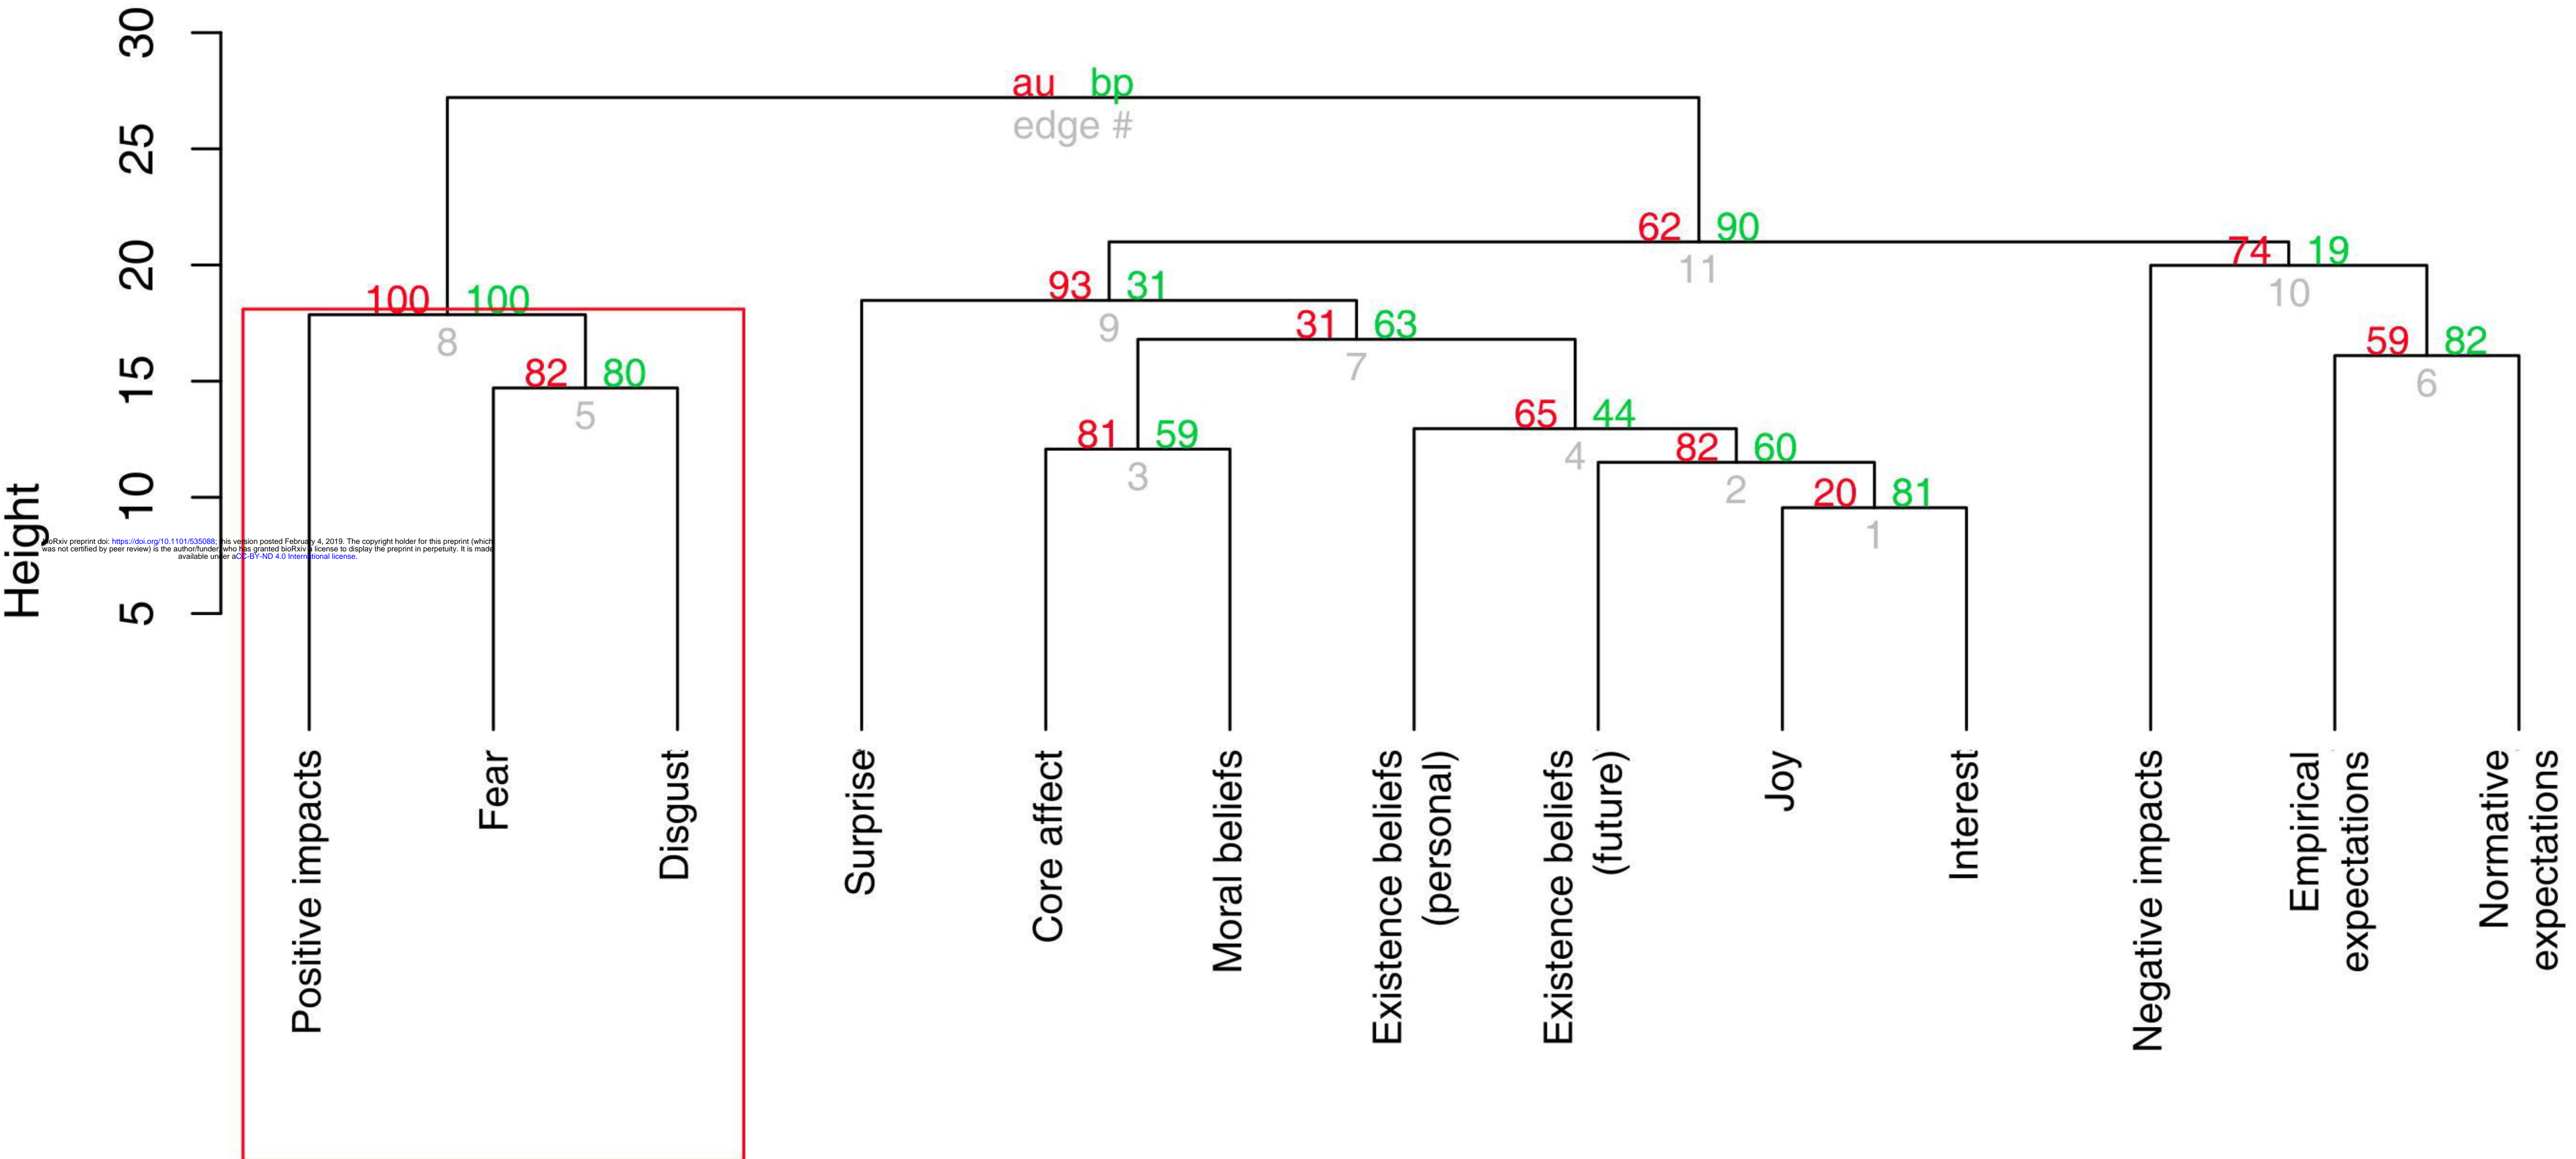

bioRxiv preprint doi: <https://doi.org/10.1101/535088>; this version posted February 4, 2019. The copyright holder for this preprint (which was not certified by peer review) is the author/funder, who has granted bioRxiv a license to display the preprint in perpetuity. It is made available under aCC-BY-ND 4.0 International license.

Predicted values for Normative expectations

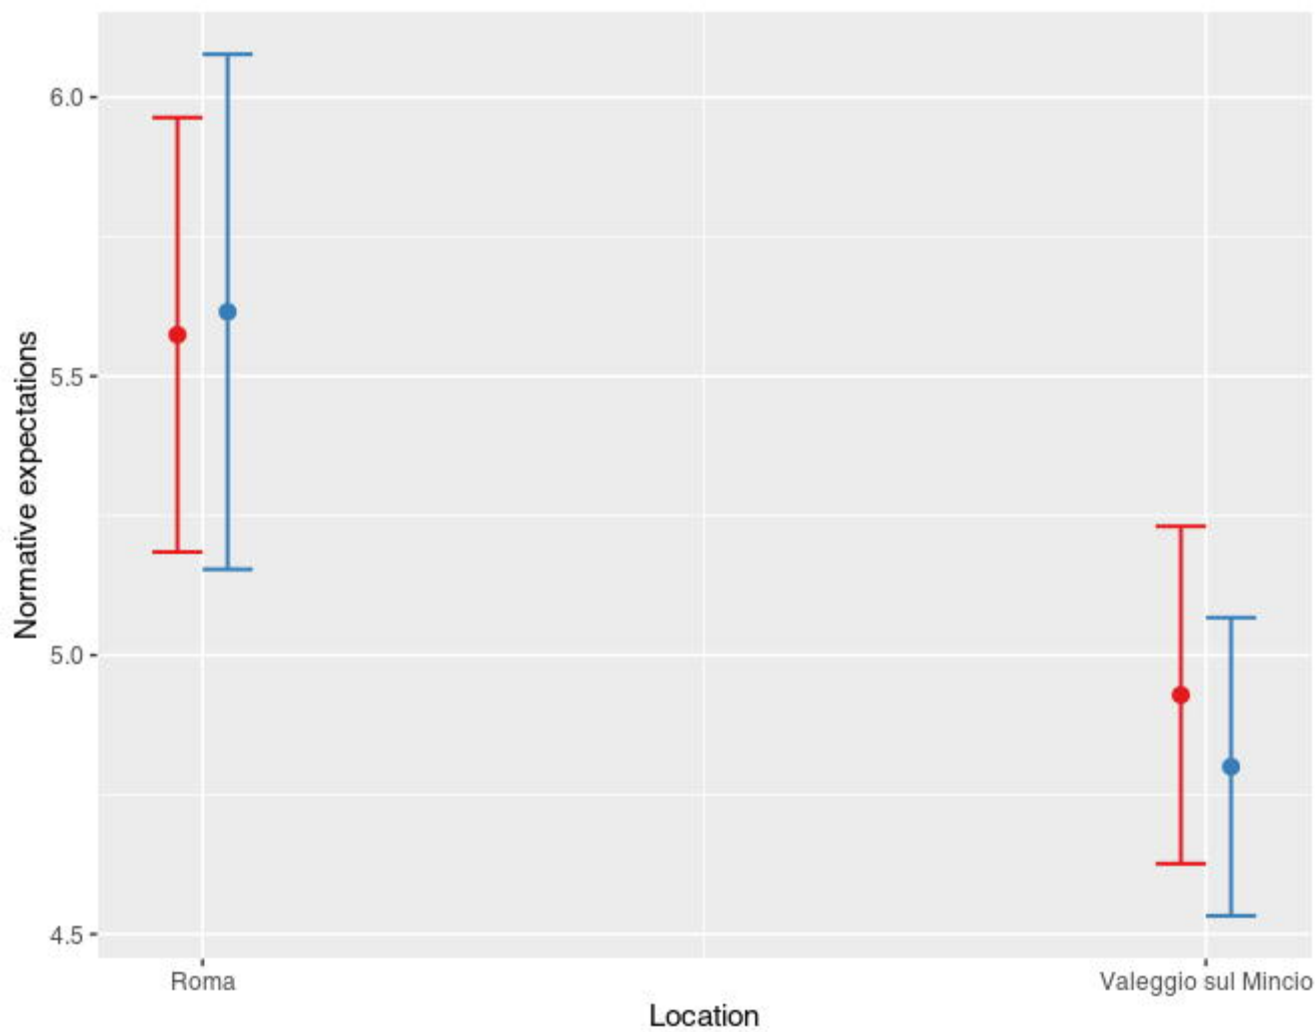

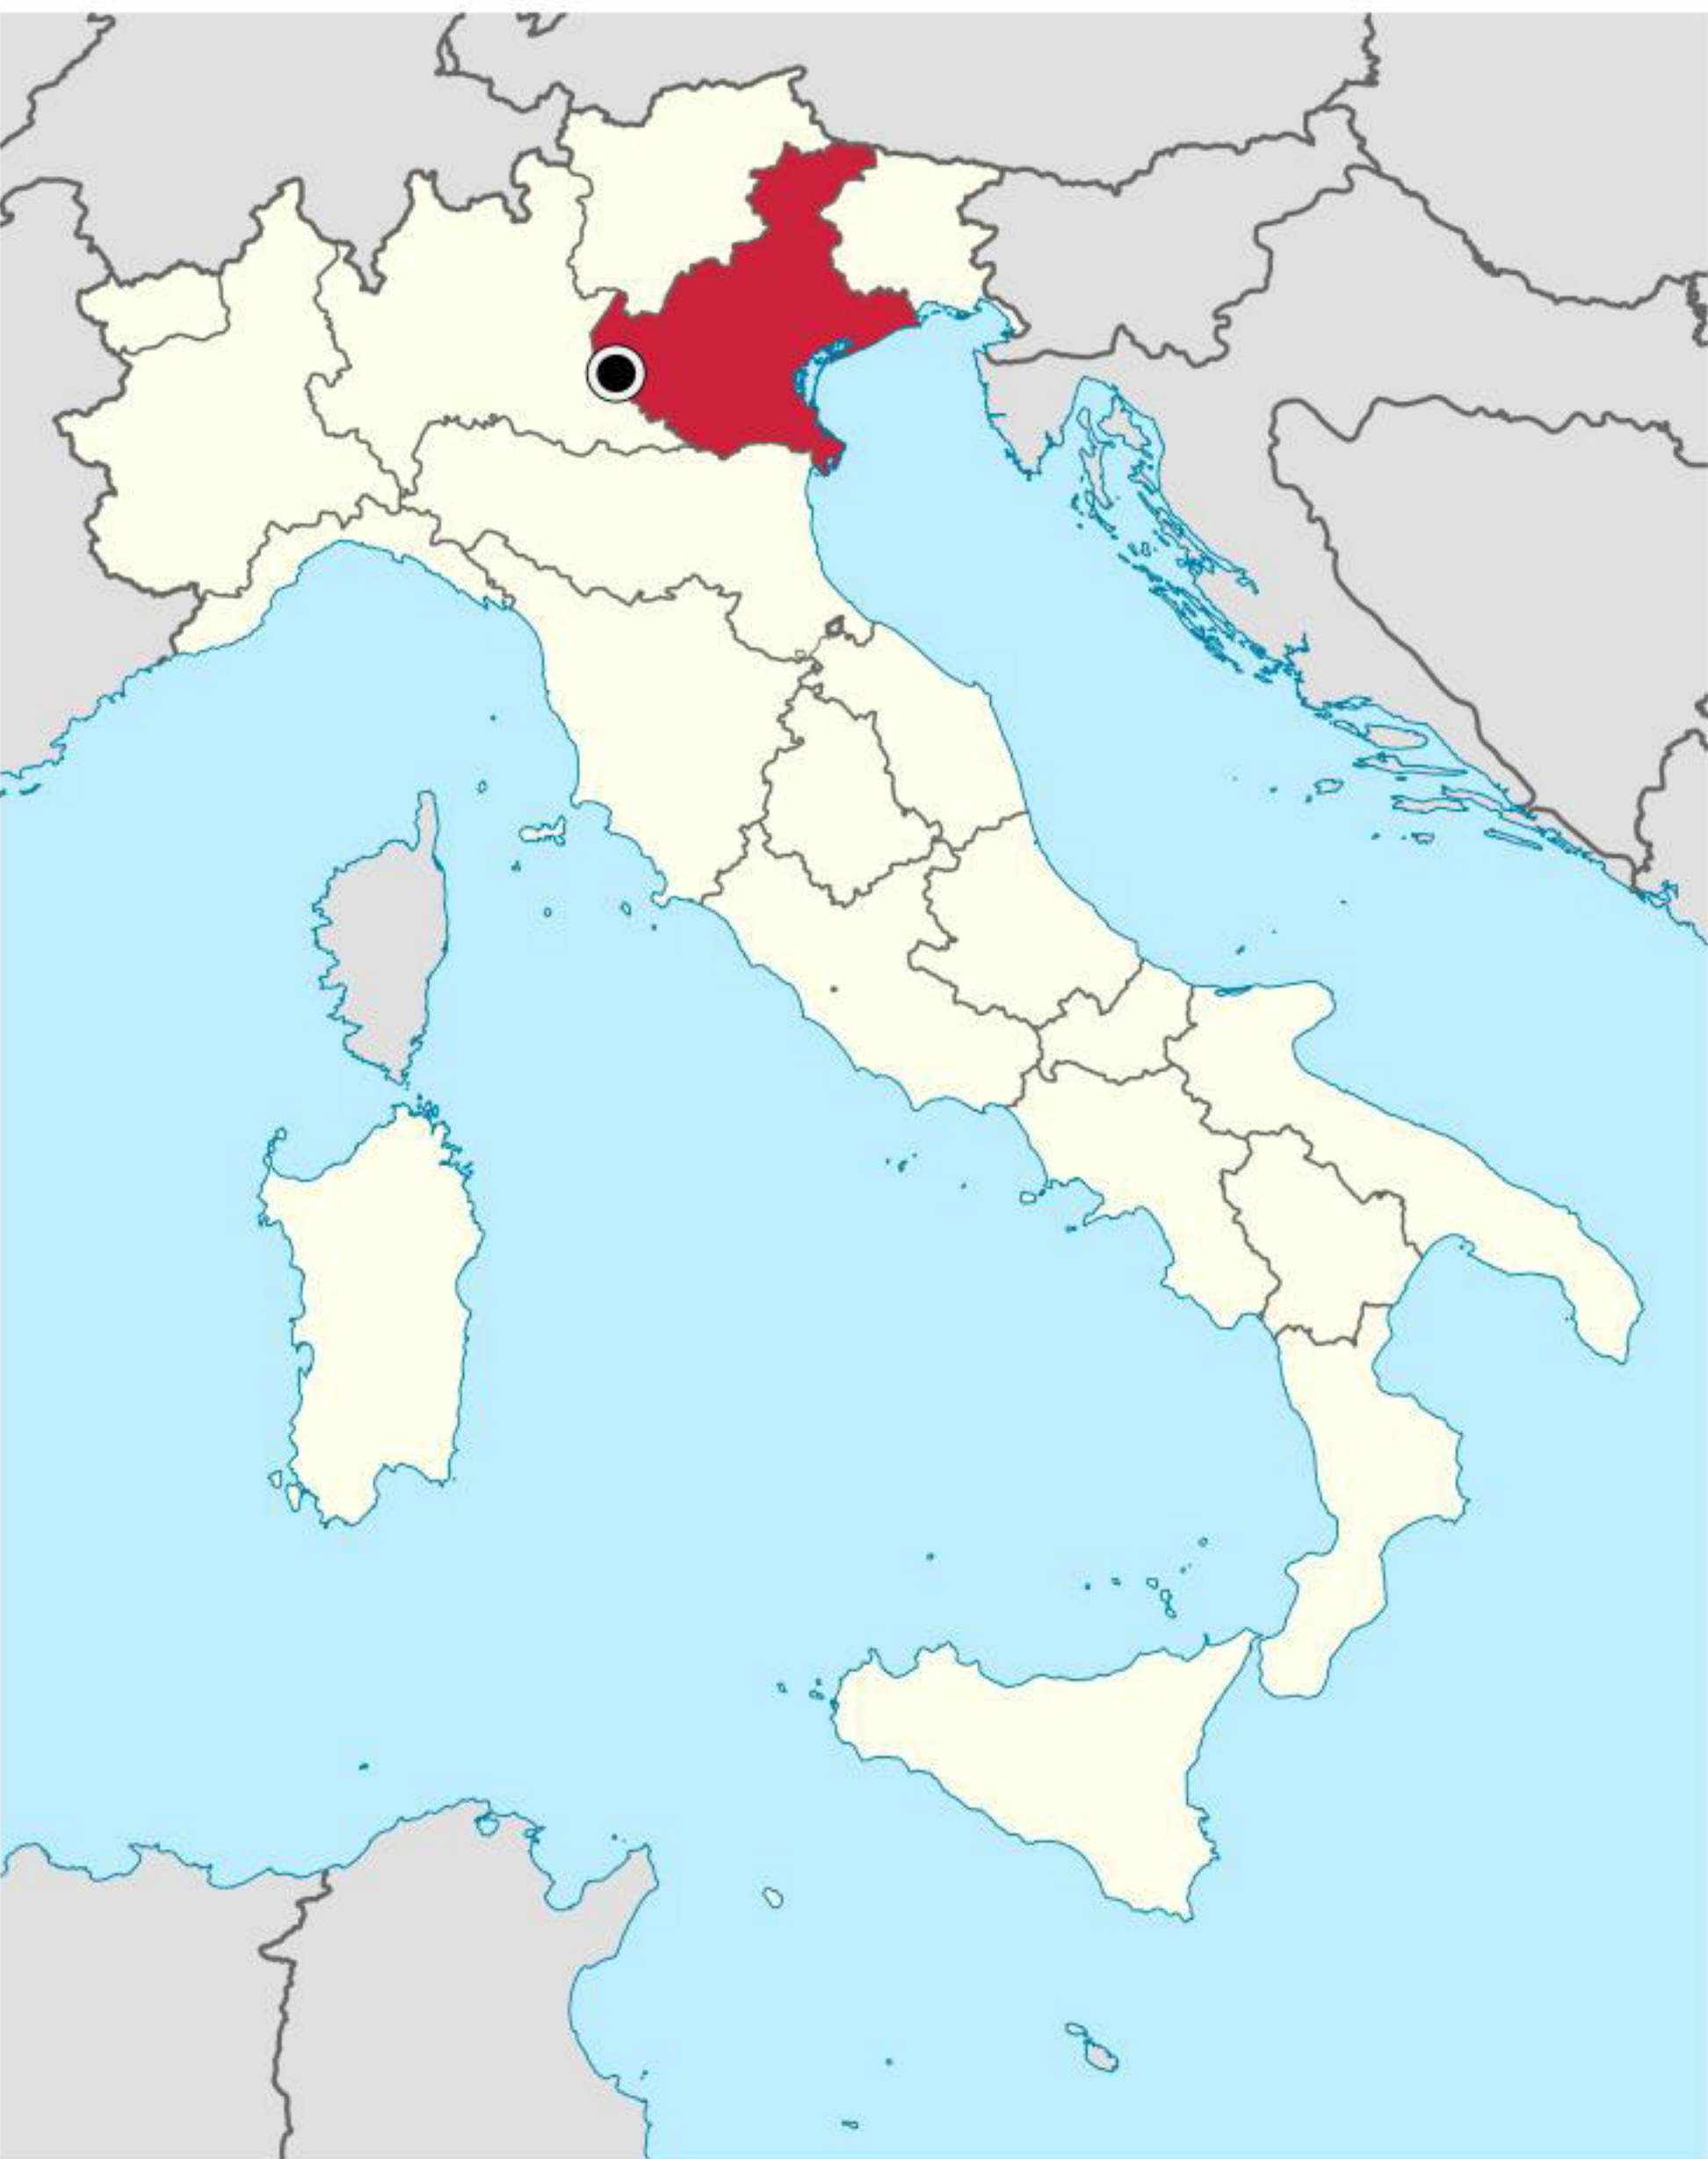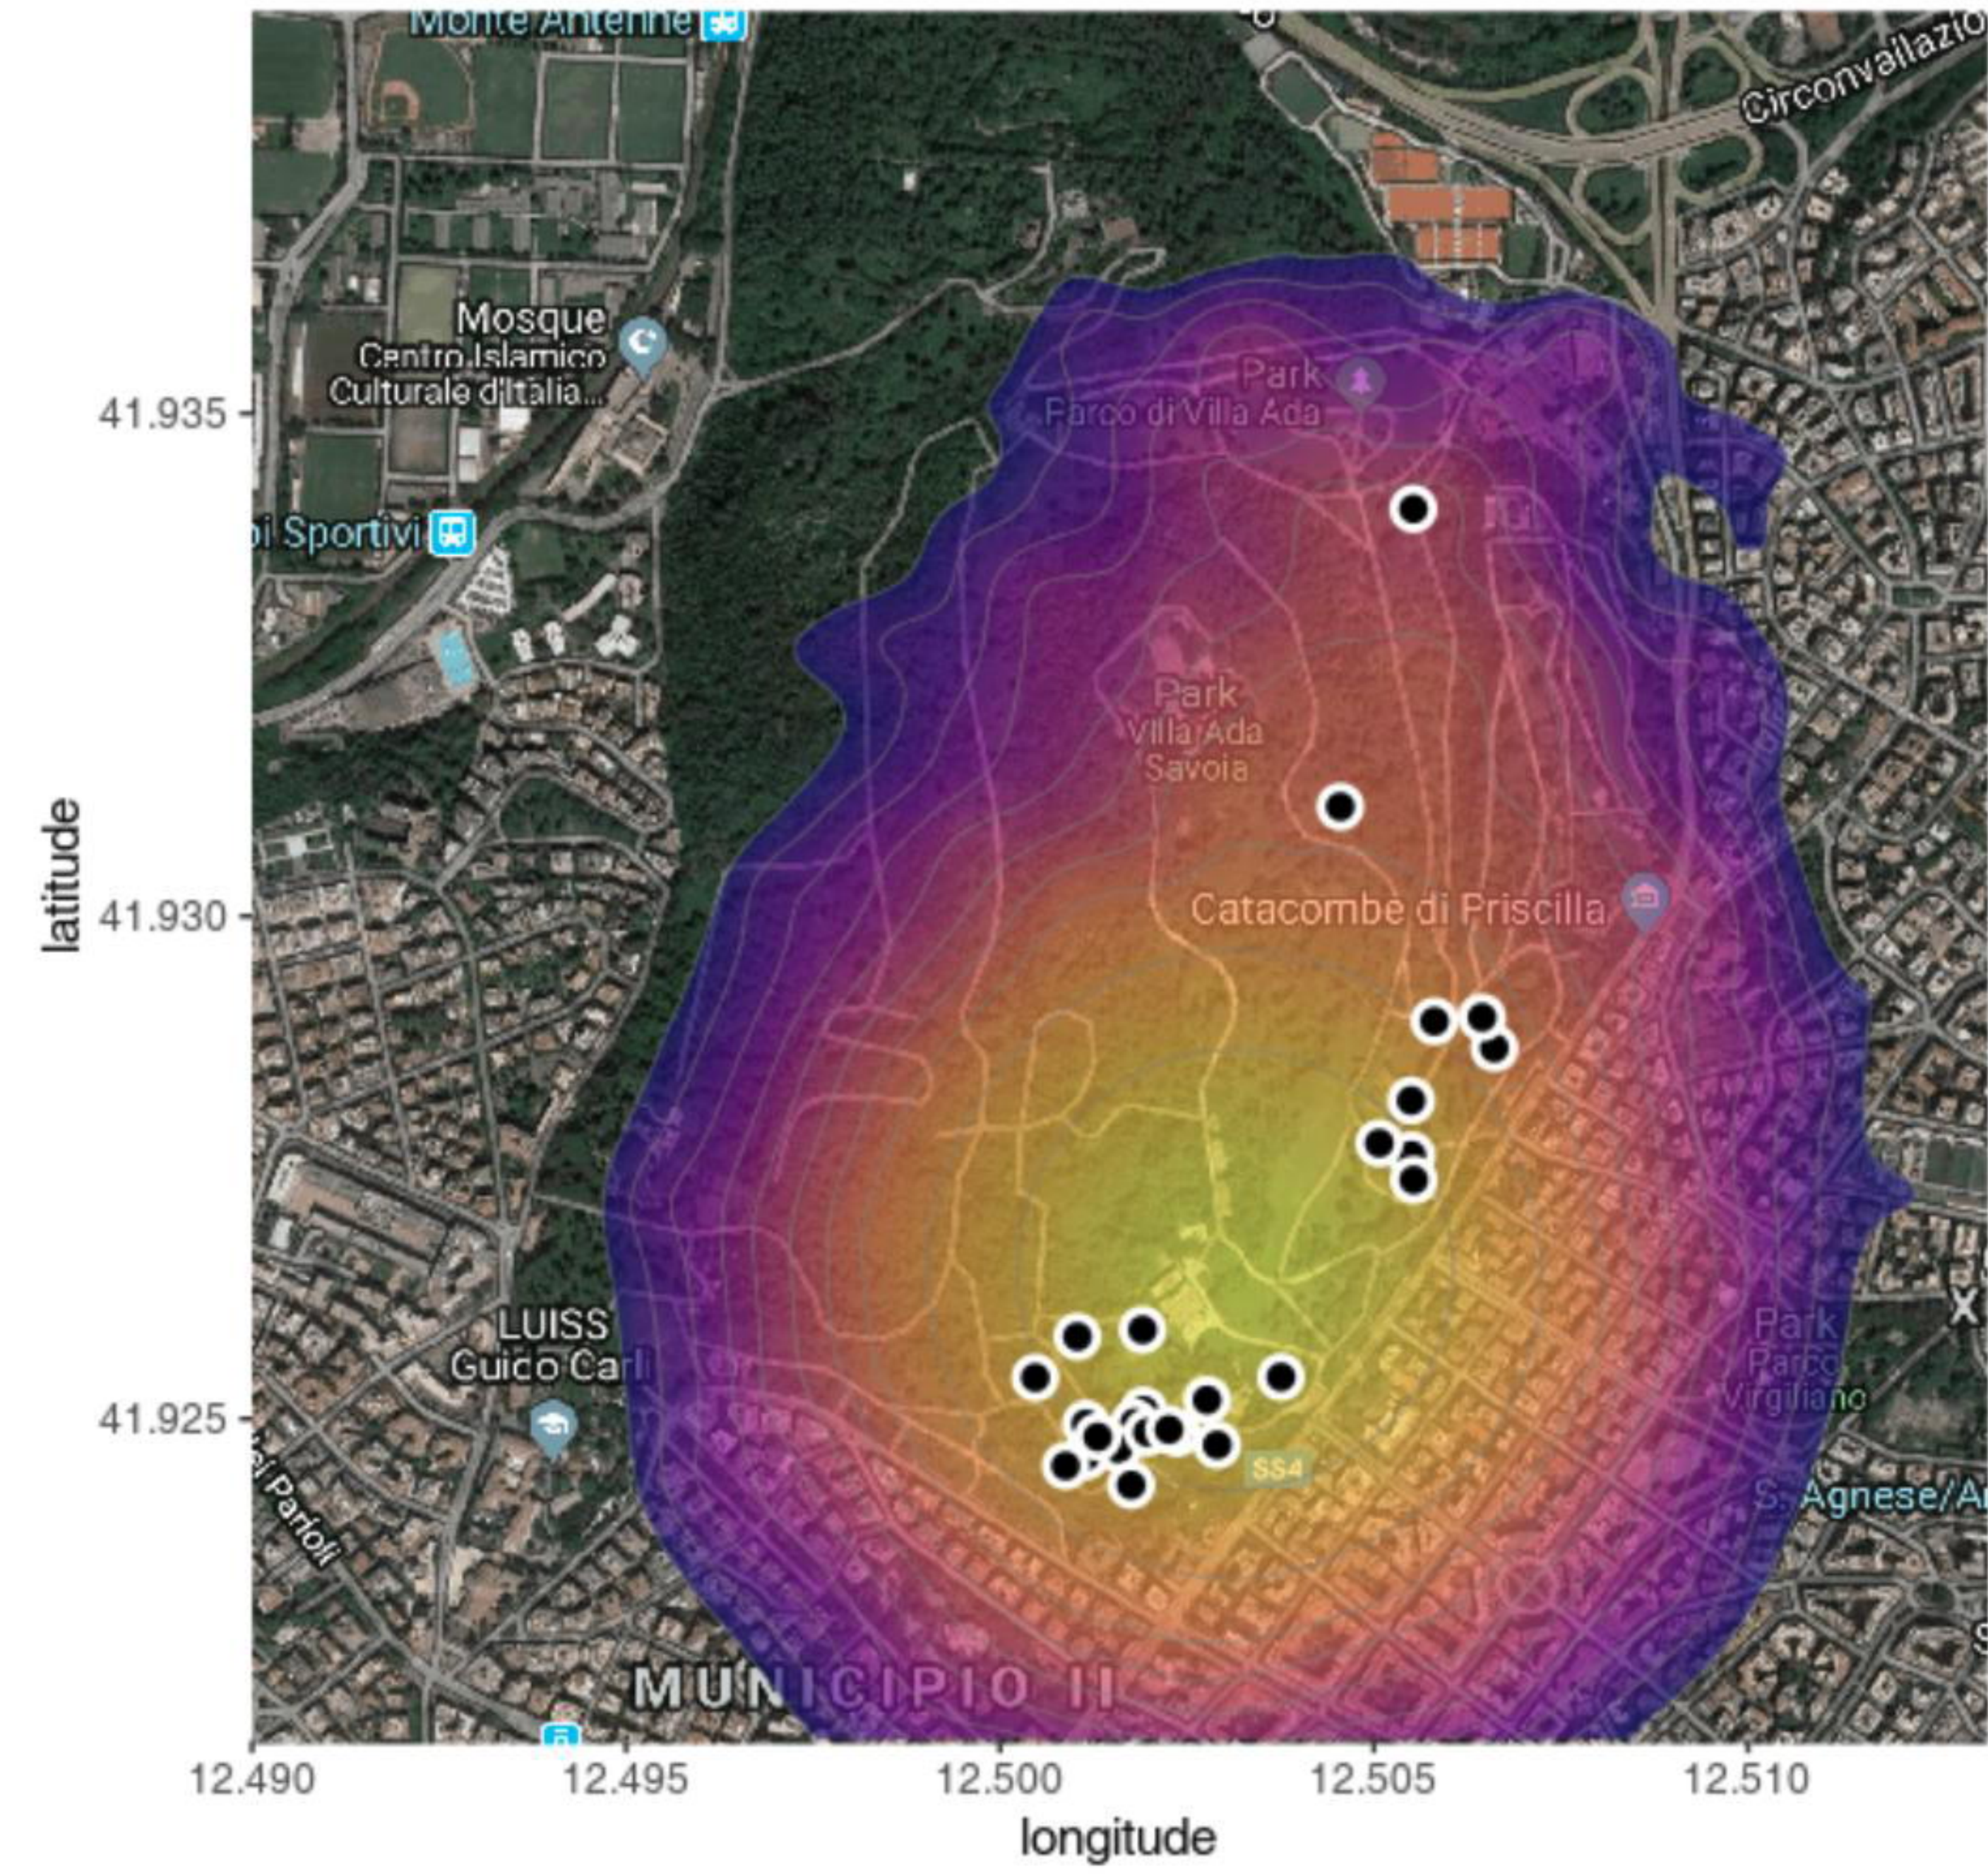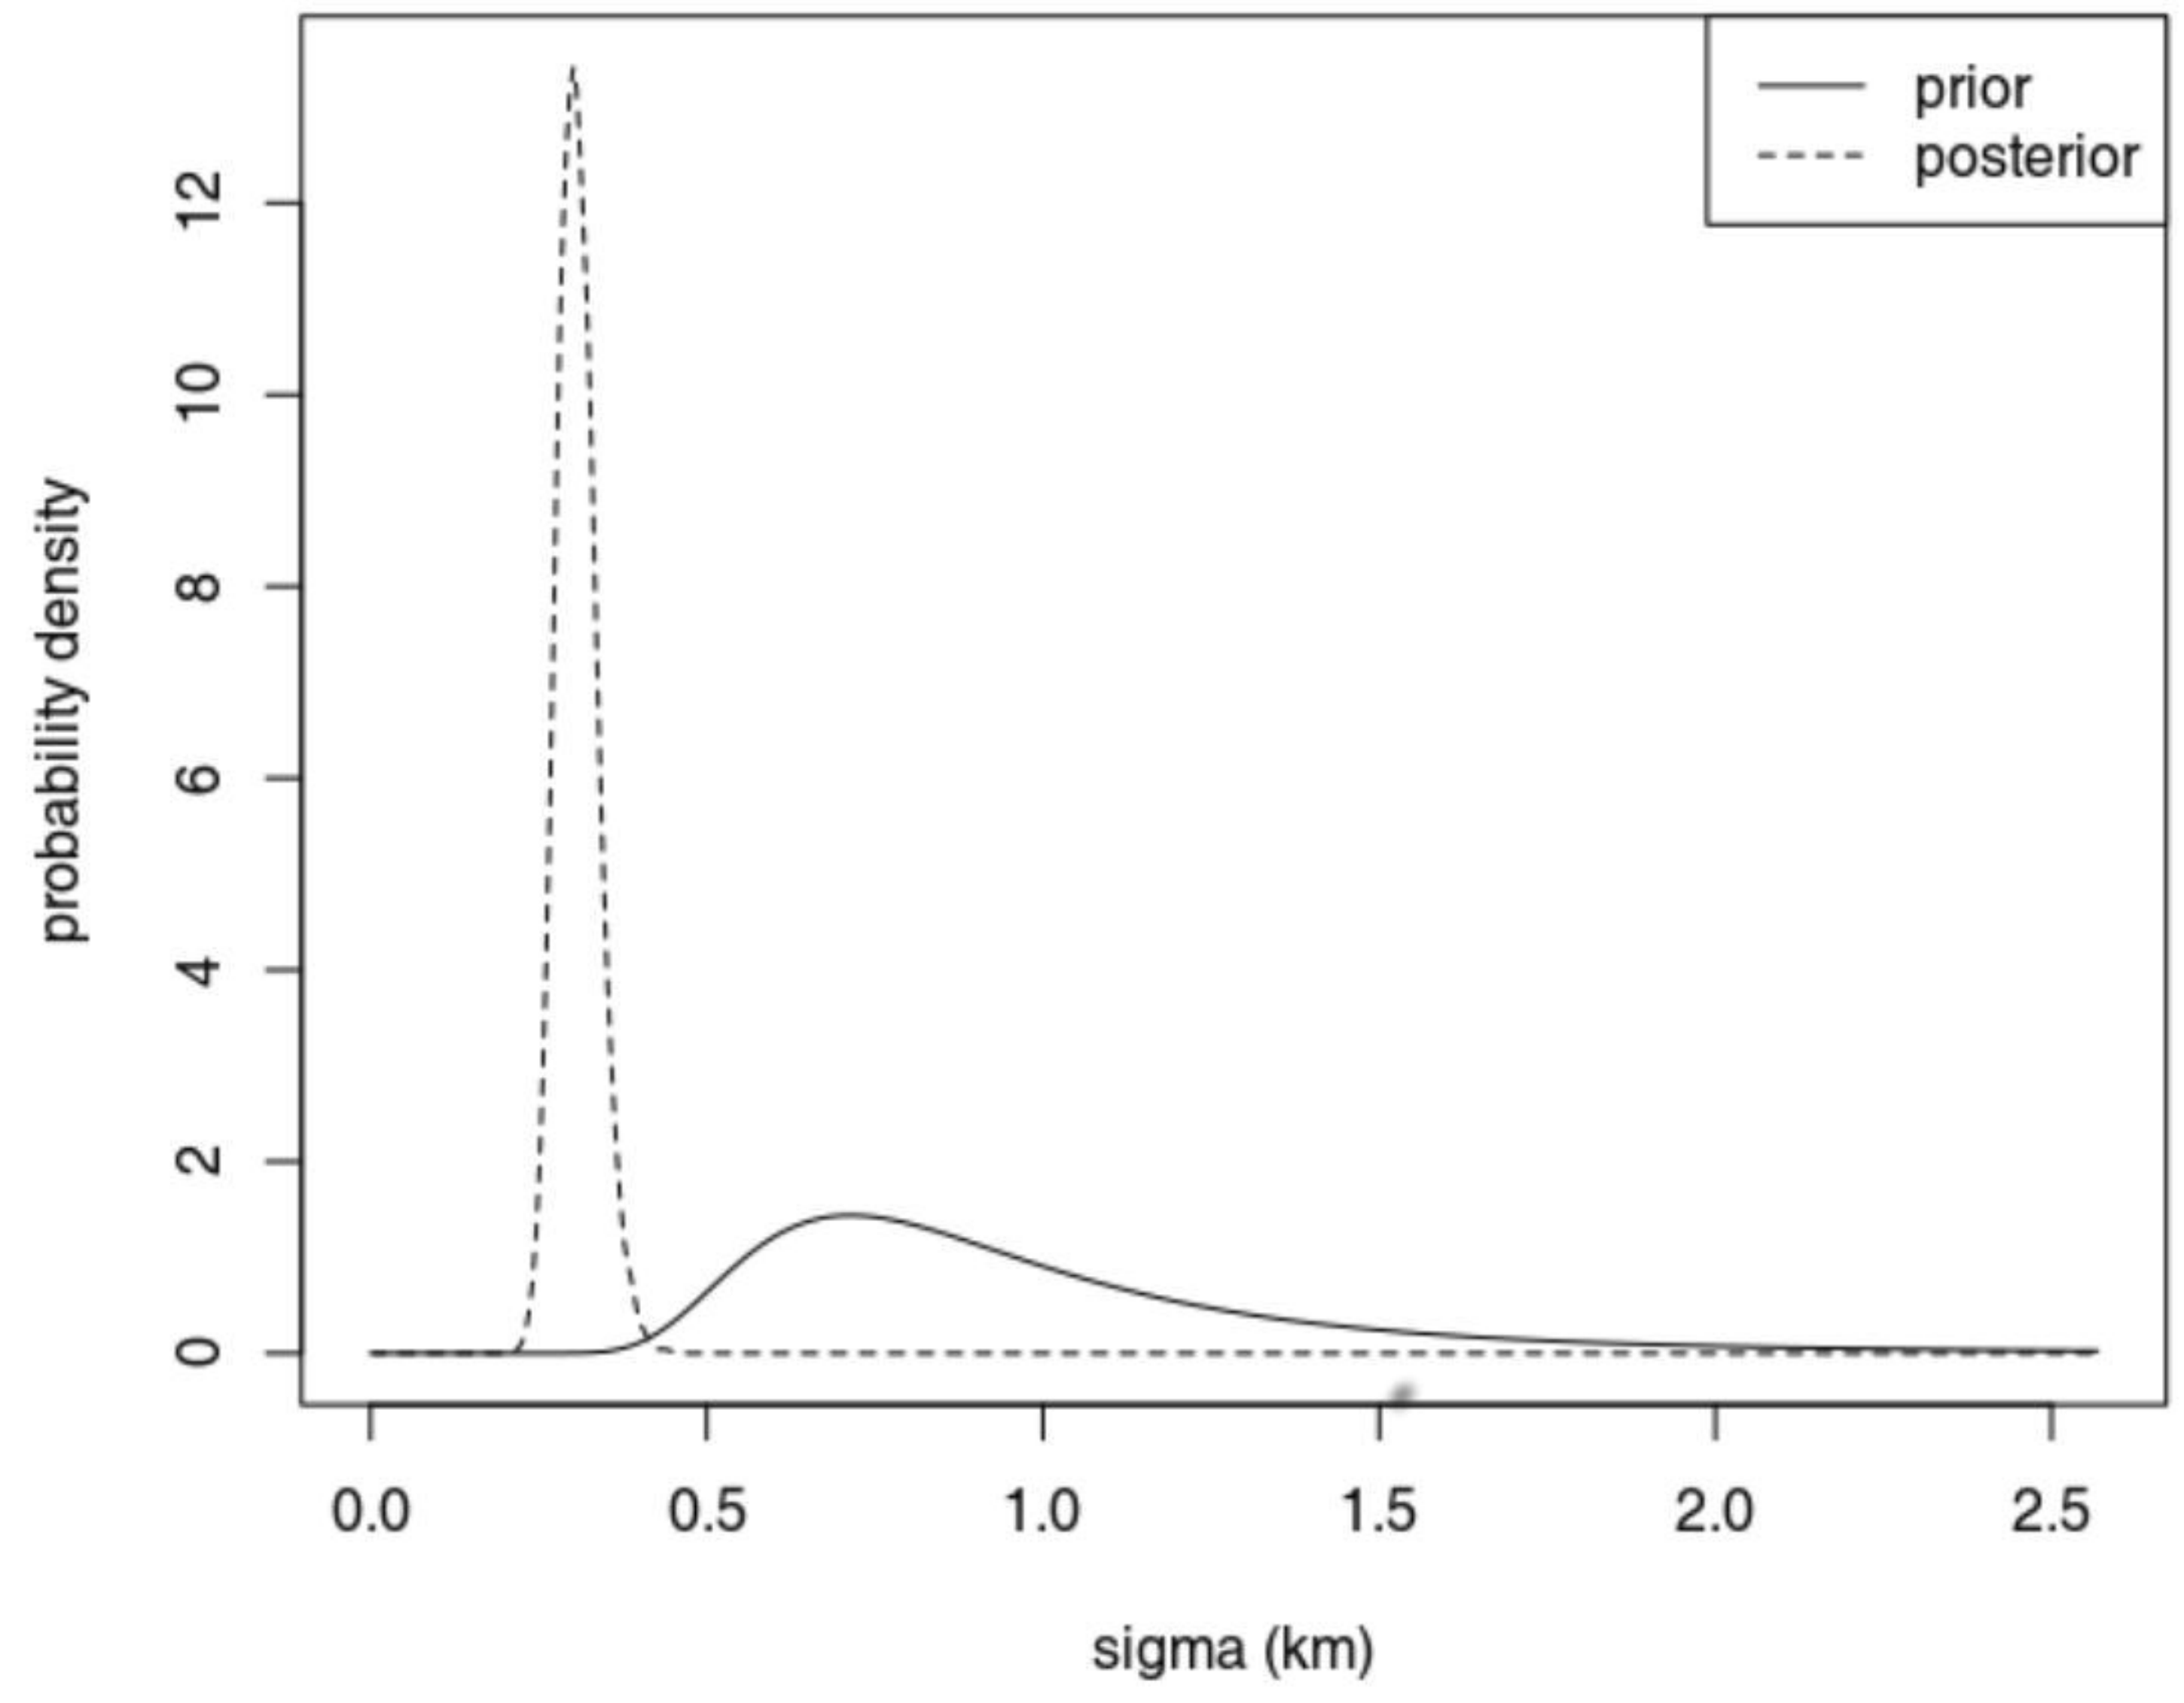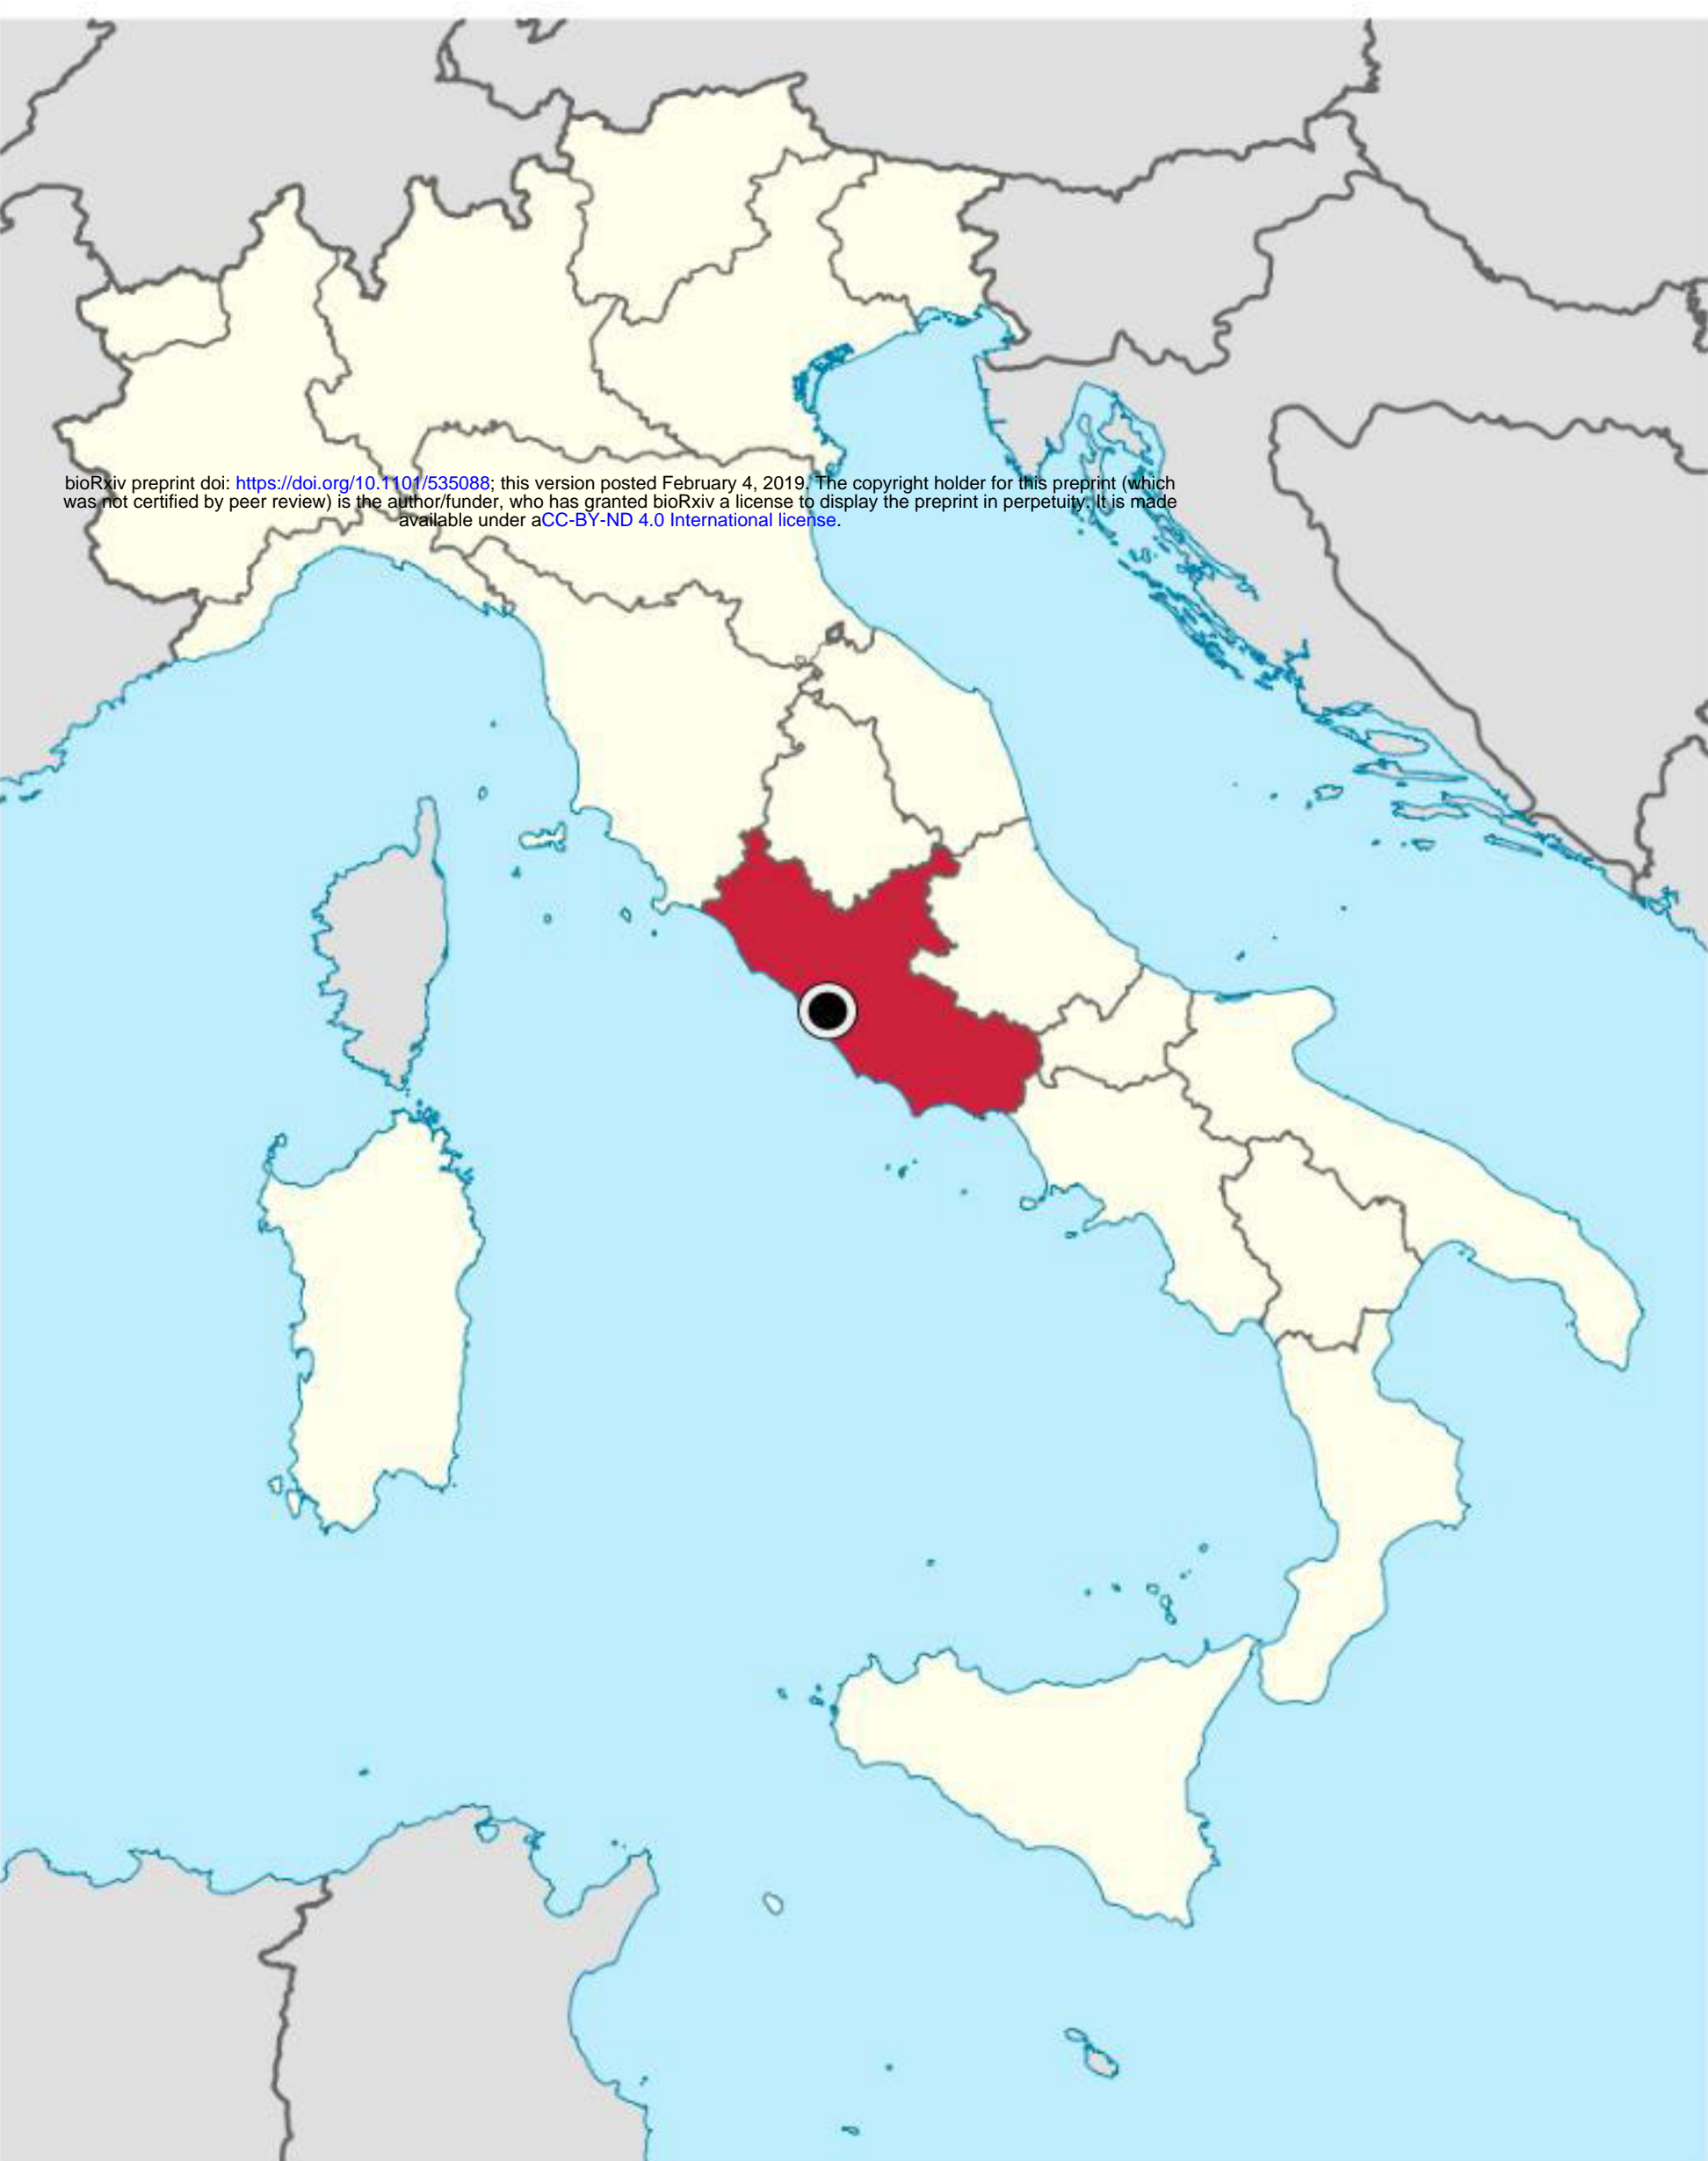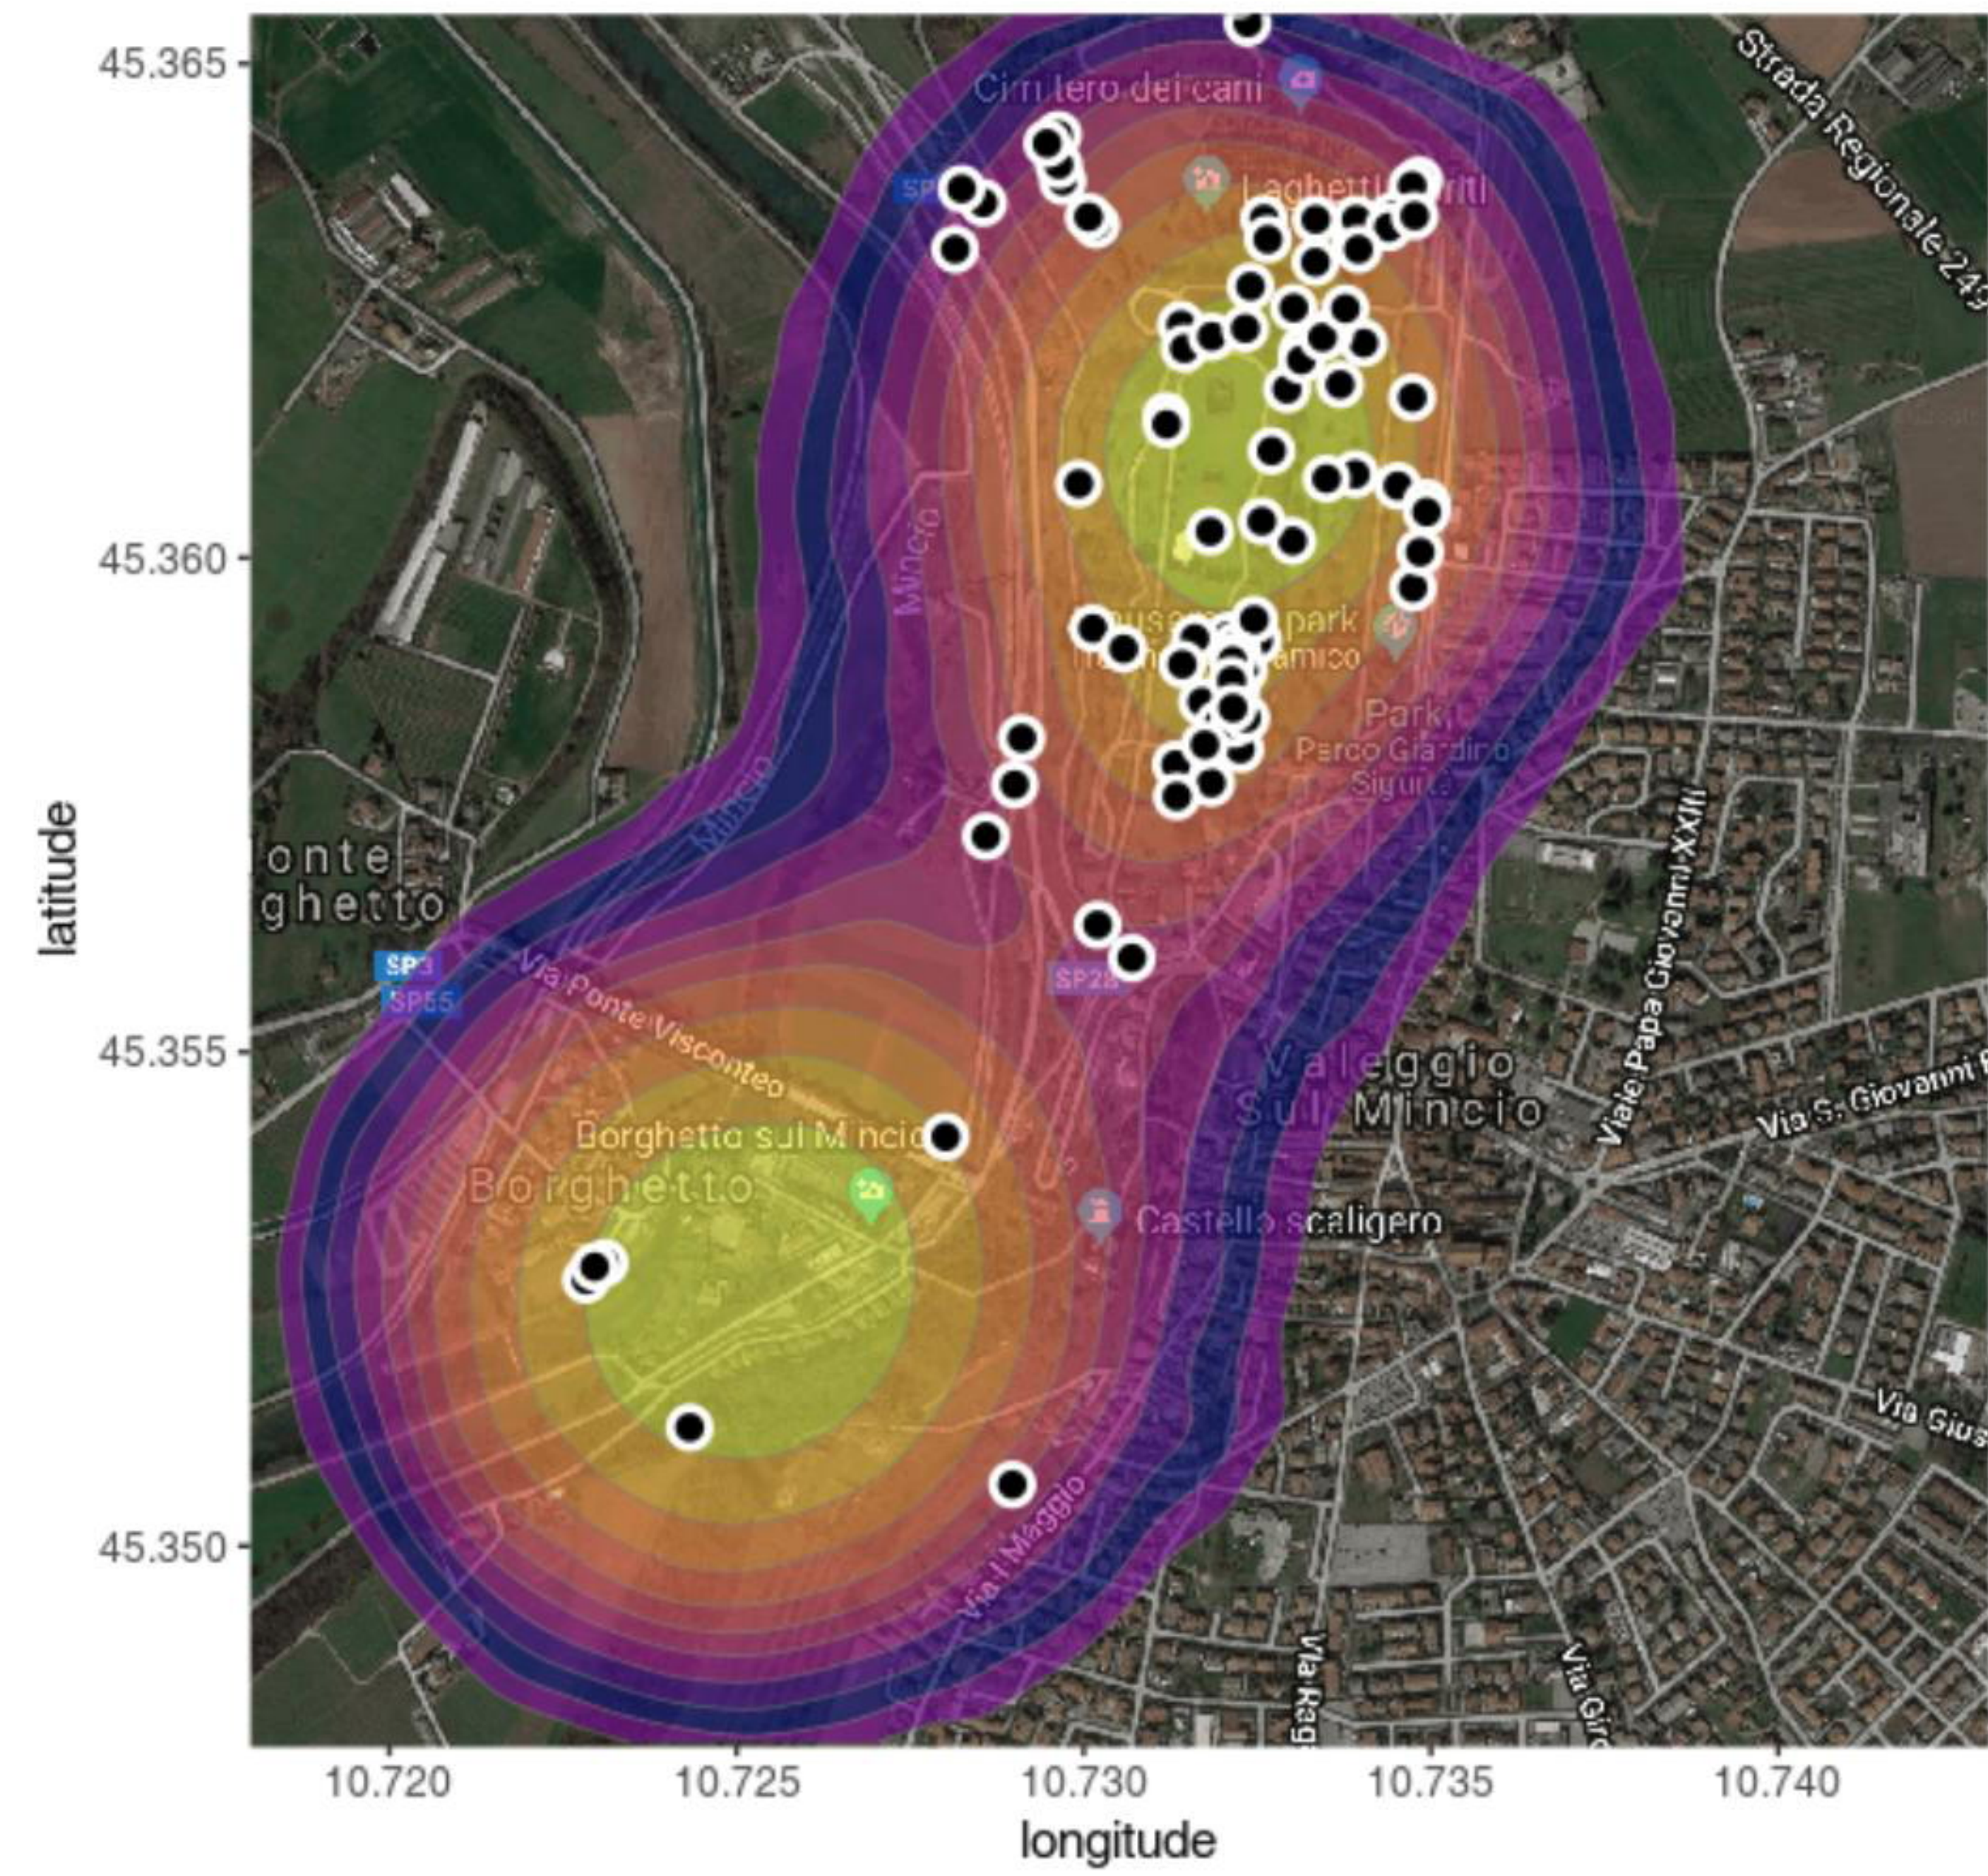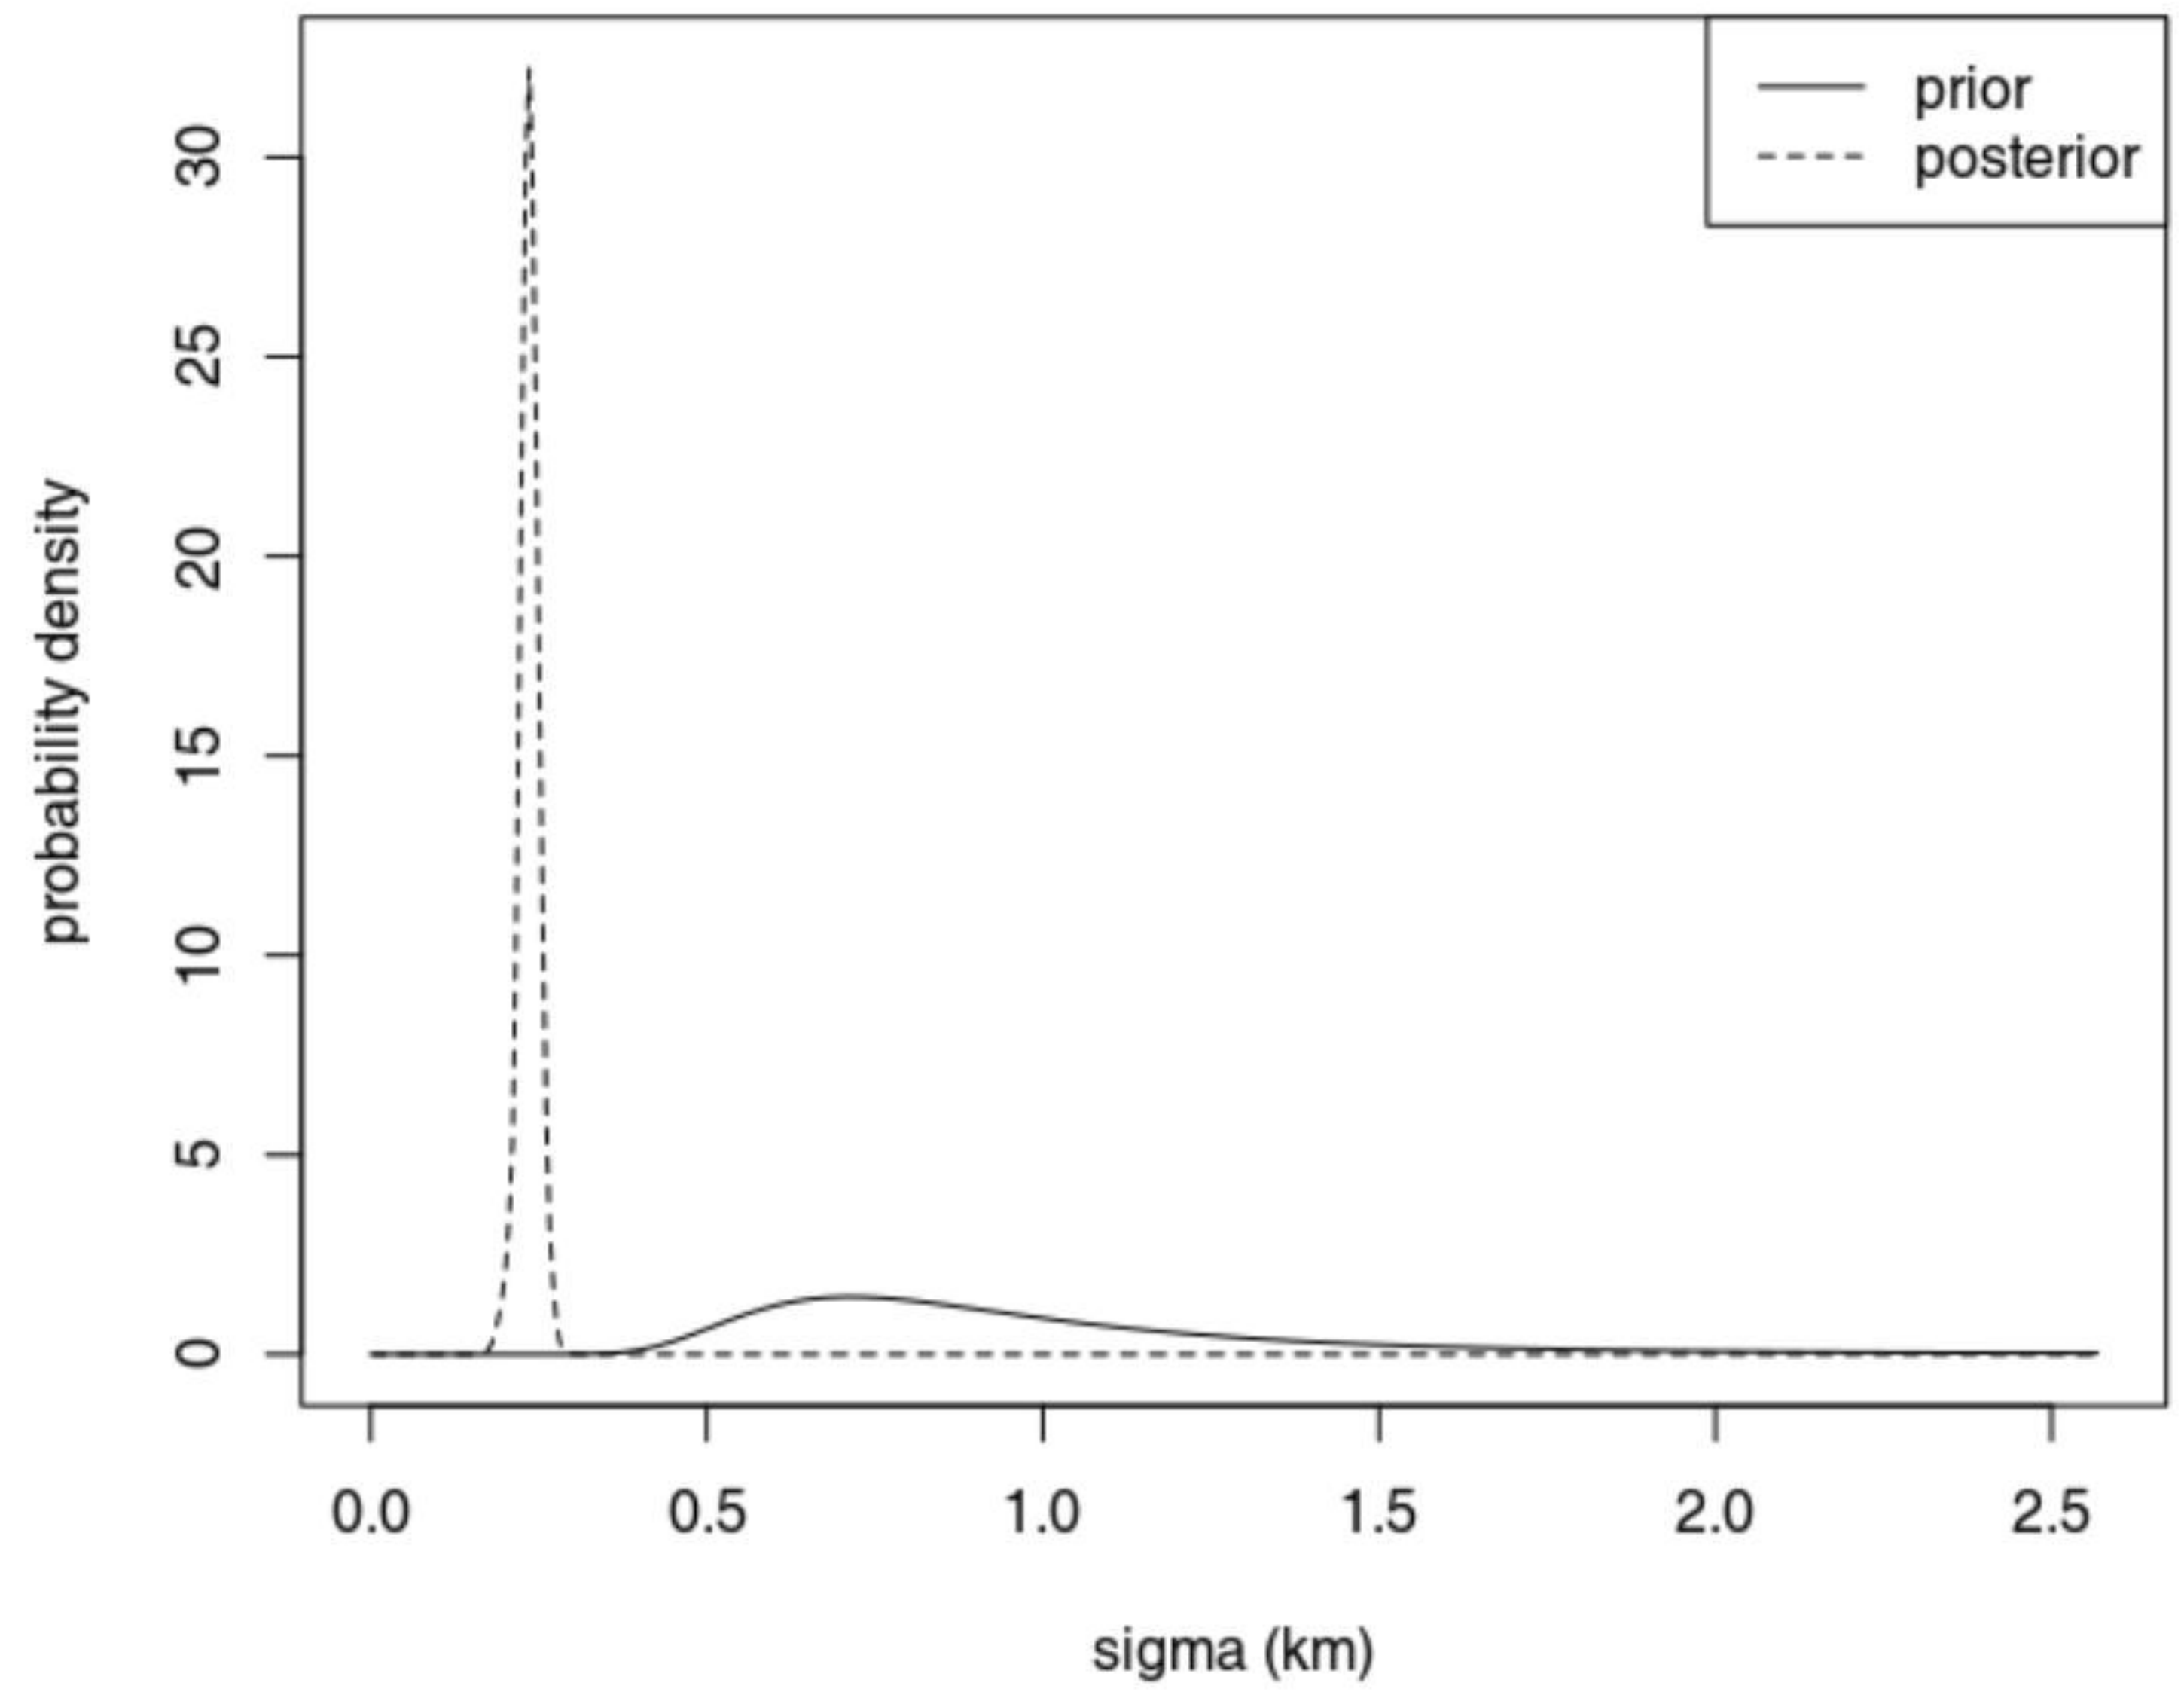

Source: https://www.biorxiv.org/content/10.1101/535088v2.full.pdf
